# 1 Identification of a dominant chlorosis phenotype through a 2 forward screen of the *Triticum turgidum* cv. Kronos TILLING 3 population

4 **Sophie A. Harrington<sup>1</sup>, Nicolas Cobo<sup>2</sup>, Miroslava Karafiátová<sup>3</sup>, Jaroslav Doležel<sup>3</sup>,  
5 Philippa Borrill<sup>1,4</sup>, Cristobal Uauy<sup>1\*</sup>**

6 <sup>1</sup> John Innes Centre, Norwich Research Park, Norwich, NR4 7UH, United Kingdom

7 <sup>2</sup> Department of Plant Sciences, University of California-Davis, Davis, CA 95616 USA

8 <sup>3</sup> Institute of Experimental Botany, Centre of the Region Haná for Biotechnological and  
9 Agricultural Research, Šlechtitelů 31, CZ-78371, Olomouc, Czech Republic

10 <sup>4</sup> School of Biosciences, University of Birmingham, Birmingham, B15 2TT, United Kingdom

## 11 \*Correspondence:

12 Cristobal Uauy

13 cristobal.uauy@jic.ac.uk

15 **Keywords: Durum wheat, Genomics, Senescence, Chlorosis, Bulked-segregant analysis,  
16 TILLING, Mapping-by-sequencing**

## 18 Abstract

19 Durum wheat (*Triticum turgidum*) derives from a hybridization event approximately 400,000  
20 years ago which led to the creation of an allotetraploid genome. Unlike with more ancient  
21 whole genome duplications, the evolutionary recent origin of durum wheat means that its  
22 genome has not yet been fully diploidised. As a result, many of the genes present in the  
23 durum genome act in a redundant fashion, meaning that, in many cases, loss-of-function  
24 mutations must be present in both gene copies to observe a phenotypic effect. This  
25 redundancy has hindered the use of forward genetic screens in durum wheat. Here we use a  
26 novel set of induced variation within the cv. Kronos TILLING population to identify a locus  
27 controlling a dominant, environmentally-dependent chlorosis phenotype. We carried out a  
28 forward screen of the sequenced cv. Kronos TILLING lines for senescence phenotypes and  
29 identified a single line with a dominant early senescence and chlorosis phenotype. Mutant  
30 plants contained overall less chlorophyll throughout their development and displayed  
31 premature flag leaf senescence. A segregating population was classified into discrete  
32 phenotypic groups and subjected to bulked-segregant analysis using exome capture followed  
33 by next-generation sequencing. This allowed the identification of a single region on  
34 chromosome 3A, *Yellow Early Senescence 1 (YES-1)*, which was associated with the mutant  
35 phenotype. To obtain further SNPs for fine-mapping, we isolated chromosome 3A using flow  
36 sorting and sequenced the entire chromosome. By mapping these reads against both the cv.  
37 Chinese Spring reference sequence and the cv. Kronos assembly, we could identify high-  
38 quality, novel EMS-induced SNPs in non-coding regions within *YES-1* that were previously  
39 missed in the exome capture data. This allowed us to fine-map *YES-1* to 4.3 Mb, containing  
40 59 genes. Our study shows that populations containing induced variation can be sources of  
41 novel dominant variation in polyploid crop species, highlighting their importance in future

42 genetic screens. We also demonstrate the value of using cultivar-specific genome assemblies  
43 alongside the gold-standard reference genomes particularly when working with non-coding  
44 regions of the genome. Further fine-mapping of the *YES-1* locus will be needed to identify the  
45 causal SNP underpinning this dominant, environmentally dependent phenotype.

## 46 **Introduction**

47 Polyploidisation events underpin plant evolution and have been suggested to be key drivers  
48 of innovation, particularly within the angiosperms (Soltis and Soltis, 2016). All angiosperm  
49 species, including important crops such as wheat, rice, and maize, carry signatures within  
50 their genomes of ancient whole genome duplication (WGD) events that occurred within their  
51 lineage, such as the monocot-specific duplication,  $\tau$  (Paterson et al., 2012). These  
52 polyploidisation events lead to the presence of multiple copies of genes which previously  
53 carried out the same function. It has been proposed that, following WGD, the resulting  
54 diploidisation of the genome leads to neo-functionalization or sub-functionalisation of gene  
55 copies derived from the original WGD (Dodsworth et al., 2016, Clark and Donoghue, 2018).  
56 The diploidisation process reduces the redundancy present within the genome by minimising  
57 the number of genes with duplicate functions.

58 However, unlike rice and maize, wheat has also undergone two more recent  
59 allopolyploidisation events, where inter-species hybridizations bring together the  
60 chromosomes of each parent, creating a hybrid species with higher ploidy. The first event,  
61 approximately 400,000 years ago, occurred when two wild grasses hybridized to produce a  
62 tetraploid grass (wild emmer) which would go on to be domesticated as pasta, or durum,  
63 wheat (*Triticum turgidum*) (Dubcovsky and Dvorak, 2007, Borrill et al., 2019). The second  
64 polyploidisation event occurred more recently, only 10,000 years ago, when the tetraploid  
65 emmer hybridised with another diploid wild grass, leading to a hexaploid species which was  
66 then domesticated as bread wheat (*Triticum aestivum*). Unlike in ancient WGDs, these  
67 polyploidisation events have occurred relatively recently, such that most wheat genes are  
68 present as homoeologous duos or triads in pasta and bread wheat, respectively, and may often  
69 have redundant functions (Ramírez-González et al., 2018).

70 A direct result of this homoeolog redundancy is that the inheritance of many traits in  
71 polyploid wheat tend to be quantitative, with multiple homoeologous loci contributing partly  
72 to the phenotype (Borrill et al., 2019, Brinton and Uauy, 2019). The phenotypic consequences  
73 of mutations in single homoeologs in wheat can be broadly classified into three categories —  
74 dominant (e.g. *VRNI*), whereby the mutant allele leads to a complete change in phenotype  
75 akin to mutations in diploids (Yan et al., 2003); additive (e.g. *NAM*, *GW2*), whereby mutants  
76 in each homoeolog lead to a partial change in phenotype which becomes additive as  
77 mutations are combined (Avni et al., 2014, Pearce et al., 2014, Borrill et al., 2018, Wang et  
78 al., 2018); and full redundancy (e.g. *MLO*), whereby the single and double mutants are  
79 similar to wildtype individuals, and only the full triple mutant leads to significant phenotypic  
80 variation (Acevedo-Garcia et al., 2017). The presence of homoeolog redundancy, therefore,  
81 can hinder the use of forward genetic screens in polyploid wheat.

82 Therefore, beyond its status as an important crop, tetraploid pasta wheat can provide a useful  
83 system to reduce the redundancy inherent in polyploid wheat. New advances in wheat  
84 genomics resources are increasing the speed and resolution with which we can now map loci  
85 corresponding to quantitative traits (Uauy, 2017). Recently gold-standard reference genomes

86 for wheat were released, based on the hexaploid landrace Chinese Spring (IWGSC et al.,  
87 2018) and the tetraploid cultivar Svevo (Maccaferri et al., 2019). Additional wheat cultivars  
88 from across the globe are being sequenced as part of the wheat 10+ pan-genome project (10+  
89 Wheat Genomes Project, 2016). Crucially, this also includes durum wheat cultivar Kronos,  
90 which was used in the development of an *in silico* TILLING population (Krasileva et al.,  
91 2017). This mutant resource contains over 4M chemically-induced point mutation variation  
92 that can be rapidly accessed for a gene of interest through Ensembl Plants (Vullo et al.,  
93 2017).

94 An additional challenge when working in wheat is the sheer size of the genome,  
95 approximately 16 Gb in hexaploid and 11 Gb in tetraploid wheat. This is particularly  
96 important when designing sequencing strategies of mutant populations or individuals for  
97 mapping-by-sequencing. Various reduced representation methods exist for subsampling the  
98 wheat genome. These include gene-based methods through exome capture (Mamanova et al.,  
99 2010, Krasileva et al., 2017) or sequencing a specific gene family, as in R-gene enrichment  
100 sequencing (RenSeq) (Jupe et al., 2013, Steuernagel et al., 2016). However, these methods  
101 are less successful in obtaining variant information from non-coding regions due to their  
102 focus on genic regions. This is particularly important in the case of dominant phenotypes,  
103 which are often due to variations in regulatory regions that are not within the gene body (Yan  
104 et al., 2004, Fu et al., 2005, Borrill et al., 2015), although not exclusively (Simons et al.,  
105 2006, Greenwood et al., 2017). Methods do exist, however, to facilitate subsampling of the  
106 wheat genome while still retaining information from non-coding regions. In particular,  
107 chromosome flow sorting reduces the size of the genome by isolating an entire chromosome  
108 which can then be sequenced (Doležel et al., 2012). Other techniques (implemented in rice)  
109 include skim sequencing, which uses low coverage to obtain information about deletions or  
110 duplications, as well as SNPs, across the genome (Huang et al., 2009).

111 Here we use the Kronos TILLING population as a case study to identify and fine-map a novel  
112 locus in a tetraploid background (Krasileva et al., 2017). We performed a forward screen of  
113 the Kronos TILLING population for lines that exhibited late or early senescence phenotypes.  
114 From this set, we identified a line that segregated for a dominant chlorosis phenotype and was  
115 consistent across multiple years of field trials. We used mapping-by-sequencing to define the  
116 dominant phenotype as a single Mendelian locus on chromosome 3A, which we called *Yellow*  
117 *Early Senescence-1*. Using exome capture and chromosome flow-sorting to subsample the  
118 large wheat genome, we utilised the new RefSeqv1.0 hexaploid reference genome (IWGSC et  
119 al., 2018) alongside an assembly of the durum cultivar Kronos to identify SNPs across the  
120 region of interest. Following this, we mapped the *Yellow Early Senescence-1* locus to 4.3 Mb,  
121 containing 59 high-confidence genes.

## 122 **Methods**

### 123 **Field Trials**

#### 124 *TILLING population screen*

125 The initial screen of the sequenced Kronos TILLING population (N=951 M<sub>4</sub> lines) was  
126 carried out on un-replicated single 1 m rows (Supplementary Figure 1A), sown in November  
127 2015 at Church Farm, Bawburgh (52°38'N 1°10'E). Note that all John Innes Centre (JIC)  
128 trials were sown at Church Farm, but in different fields at the farm in each year. Lines were

129 sown in numerical order (i.e. line Kronos0423 was followed by Kronos0427). For simplicity,  
130 TILLING lines will be referred to as KXXXX throughout the manuscript (i.e. Kronos0423 as  
131 K0423). Wild-type controls (cvs. Kronos, Paragon, and Soissons) were sown randomly  
132 throughout the population. Rows were phenotyped for senescence as detailed below.  
133 Following scoring, 10 mutant lines with early flag leaf and/or peduncle senescence and 11  
134 mutant lines with late flag leaf and/or peduncle senescence were crossed in the glasshouse to  
135 wild-type Kronos (Supplementary Table 1). The F<sub>1</sub> plants were then self-pollinated to obtain  
136 F<sub>2</sub> seed (Fig. 1E). For three mutant lines (K0331, K3085 and K3117) we recovered  
137 insufficient F<sub>2</sub> seeds and hence these populations were not pursued further. All original  
138 mutant lines described are available through the JIC Germplasm Resources Unit  
139 ([www.seedstor.ac.uk](http://www.seedstor.ac.uk)).

#### 140 *Recombinant Scoring*

141 F<sub>2</sub> populations of the selected TILLING lines (backcrossed to cv. Kronos) were sown at  
142 Church Farm in March 2016 and grown as described previously (Harrington et al., 2019).  
143 Briefly, individual F<sub>2</sub> seeds were hand-sown in 6x6 1 m<sup>2</sup> grids, leaving approximately 17 cm  
144 between each plant (Supplementary Figure 1B). In total, we sowed 31 F<sub>2</sub> populations  
145 representing 18 distinct TILLING mutant lines. For K2282, two F<sub>2</sub> populations were sown,  
146 K2282-28 and K2282-23, and phenotyped. Seeds from both K2282 populations were taken  
147 forward for further field trials.

148 In 2017 and 2018, the F<sub>3</sub> seed from the K2282 F<sub>2</sub> plants that were either heterozygous across  
149 the identified region on chromosome 3A or contained recombination within the mapped  
150 interval were grown. In 2017, we selected 30 lines from the K2282-28 population and 8 lines  
151 from the K2282-23 population. F<sub>3</sub> seed from these 38 lines were sown in a randomized block  
152 design, replicated between 1 to 4 times depending on seed availability. Each experimental  
153 unit consisted of a 1 m<sup>2</sup> plot that contained three 1m rows of a single lines, separated from  
154 each other by ~17 cm (Supplementary Figure 1A). The primary tillers of 12 individual plants  
155 from each row were tagged before heading. In 2018, 374 individual seeds derived from 16 F<sub>2</sub>  
156 plants completely heterozygous across the SH467/SH969 region were hand-sown into a 1 m<sup>2</sup>  
157 grid (Supplementary Figure 1B) and scored as in 2016. In each year, tissue for genotyping  
158 was sampled from the tagged plants (2017) or each individual plant (2018). Senescence  
159 phenotyping was carried out as detailed below. Precipitation data for the JIC field trials was  
160 obtained from a weather station at 52°37'52.29" N, 1°10'23.57" E.

#### 161 *Phenotypic Characterisation*

162 Based on the 2017 genotypic information, nine individual F<sub>3</sub> lines genotyped as fully  
163 homozygous mutant (N = 4) or homozygous wild-type (N = 5) across the initial mapped  
164 region (from marker SH467 to SH969) were selected. Plants from these nine genotypes were  
165 sown in 2018 in 1 m<sup>2</sup> plots (two double 1 m rows separated by approximately 33 cm;  
166 Supplementary Figure 1C) and replicated 3 times in a complete randomized design. Wild-  
167 type Kronos and M<sub>5</sub> seed from the K2282 line were also sown as controls (N = 3). Two tillers  
168 in each row were tagged at heading and used for SPAD readings and genotyping. Senescence  
169 phenotyping was carried out as detailed below.

#### 170 *Davis, California Trial*

171 91 F<sub>3</sub> lines from population K2282-28 and 55 F<sub>3</sub> lines from population K2282-23 were  
172 sown at the University of California Field Station near Davis, California (38° 31' N, 121° 46'  
173 W) in November 2016. Lines were selected if the F<sub>2</sub> parent contained recombination within  
174 the SH467/SH969 region or was fully heterozygous across the region. In addition, seed from  
175 F<sub>2</sub> parents completely mutant or wild-type across the region (N = 12 each) were also selected.  
176 Lines were sown in a complete randomised design, as double 1m rows each separated by an  
177 empty row (as in the JIC 2018 trial; Supplementary Figure 1C). Eight individual plants were  
178 tagged per row at heading for plants derived from heterozygous parents, to allow genotyping  
179 and scoring of individual plants. At least two plants per double row were also tagged and  
180 sampled to verify the genotype of the completely wild-type or mutant lines. Heading and  
181 visual senescence was scored as in 2018 at the JIC, detailed below. 200 lb N/acre was applied  
182 to the trial (as ammonium sulphate), half before planting and half on March 31<sup>st</sup> (Z30 stage).  
183 The trial was treated with appropriate fungicides to prevent stripe rust (*Puccinia striiformis* f.  
184 sp. *tritici*). Precipitation data for the Davis trial was obtained from the Davis, California  
185 weather station (38° 32' 07'' N, 121° 46' 30'' W).

### 186 *Glasshouse Trial*

187 F<sub>3</sub> plants derived from mutant or wild-type F<sub>2</sub> parents, genotyped across the SH179-SH969  
188 region, were pre-germinated on damp filter paper for 48 hrs at 4°C in the dark. The seedlings  
189 were sown into P96 trays with 85% fine peat and 15% horticultural grit. Plants were  
190 transplanted to 1L pots at the 3-leaf stage. The pots contained either a) Petersfield Cereal Mix  
191 (Petersfield, Leicester, UK), b) Horticultural Sand (J. Arthur Bower's, Westland  
192 Horticulture), or c) Soil taken from the Church Farm site used for JIC field trials (Bawburgh,  
193 UK). Plants sown into sand were also supplied with 100 mL of Hoagland solution every three  
194 days (Hoagland and Arnon, 1950). K2282 mutant and wild-type F<sub>3</sub> plants were also tested  
195 under low water conditions in each of the three soil conditions listed above. Under the low  
196 water conditions, the plants were watered once weekly, and additionally to maintain a soil  
197 volumetric water content of approximately 20%, as measured with the Decagon GS3 sensor  
198 (ICT International, Armidale, Australia). Three plants of each genotype were treated in each  
199 condition. Plants were visually phenotyped for chlorosis onset, determined as a visual  
200 yellowing of the main flag leaf (see Figure 1A for a visual example).

## 201 **Plant Phenotyping**

### 202 *Senescence Phenotyping*

203 Plants were scored for senescence across the different field trials as detailed previously  
204 (Harrington et al., 2019). Briefly, when scoring individual plants, all phenotyping was carried  
205 out on the main tiller, tagged upon heading. Heading was scored at Zadoks growth stage 57,  
206 when the spike was 25% emerged (Zadoks et al., 1974). Flag leaf senescence was scored for  
207 the main tiller when 25% of the flag leaf showed visual yellowing and tissue death (necrosis)  
208 from the tip. Senescence of the main peduncle was scored when the top inch was fully  
209 yellow. When scoring rows of the same genotype, all stages were scored across the entirety  
210 of the row. Rows were considered to have reached heading when 75% of the main spikes  
211 reached Zadoks growth stage 57. Leaf senescence was similarly scored when 75% of the flag  
212 leaves were yellowing and necrotic across 25% of the leaf, from the tip. Peduncle senescence  
213 was scored when the top inch of 75% of the peduncles were completely yellow.



214 Alongside visual scoring, we utilised the SPAD-502 meter (Konica Minolta, Osaka, Japan) to  
215 obtain non-destructive chlorophyll content readings. For measurements of individual plants  
216 (2016, 2017, 2018) eight readings were taken along the flag leaf on each side of the midrib  
217 and averaged to obtain a final reading which was considered the SPAD score for that  
218 biological replicate. For measurements of rows (2018), the two tagged tillers were both  
219 measured in the same way, and the average of their measurements was taken as the SPAD  
220 reading for that biological replicate.

#### 221 *Chlorophyll Quantification*

222 Chlorophyll content was measured directly from sampled leaf tissue in 2016 and 2018 at JIC.  
223 In 2016, flag leaf tissue was sampled at heading (N = 3 per genotype); in 2018 flag leaf tissue  
224 was sampled at anthesis and the third leaf was sampled at the third leaf stage (Zadoks 13-14),  
225 approximately 24 days before anthesis (Mutant, N = 8; Wild-type, N = 10). In 2016, one leaf  
226 was sampled per individual plant and was treated as an independent biological replicate.  
227 Similarly, in 2018, one leaf was sampled per row, and treated as an independent biological  
228 replicate. Three 1 cm<sup>2</sup> discs were extracted from each leaf, one at the base of the leaf, one in  
229 the middle, and one from near the leaf tip. Chlorophyll was extracted as described previously  
230 (Wellburn, 1994); briefly, the discs of tissue were soaked in N,N-Dimethylformamide  
231 (analytical grade, Sigma Aldrich, UK) for 48-64 hrs until all pigment was completely  
232 removed from the leaf tissue. Pigment content was then quantified as previously described  
233 (Wellburn, 1994).

#### 234 *Leaf and Grain Mineral Content*

235 Mineral content was taken from grain samples (2016) and leaf tissue samples (2018). Grain  
236 and leaf samples of approximately 0.2g were dried and ground to a fine powder before  
237 digestion with 2 mL nitric acid (67-69%, low-metal) and 0.5 mL hydrogen peroxide (30-32%,  
238 low-metal) for 12 hours at 95° C. Samples were then diluted 1:11 in ultrapure water before  
239 analysis with ICP-OES (Vista- PRO CCD Simultaneous ICP-OES; Agilent). Calibration was  
240 carried out using standards of Zn, Fe, and Mg at 0.2, 0.4, 0.6, 0.8, and 1 mg L<sup>-1</sup> and Mn and P  
241 at 1,2, 3,4, and 5 mg L<sup>-1</sup>.

#### 242 *Light Microscopy*

243 Thin sections of flag leaves were cut using a razor from mutant and wild-type plants in 2018  
244 were imaged using a Leica MZ16 light microscope (Meyer Instruments, Houston, USA; N =  
245 3 per genotype).

#### 246 **Bulked Segregant Analysis**

247 Individual plants with green and yellow phenotypes from the K2282 F<sub>2</sub> populations sown at  
248 the JIC in 2016 were selected for bulked segregant analysis. DNA from plant tissues, sampled  
249 at seedling stage, was extracted using the QIAGEN DNeasy Plant Mini Kit. The quality and  
250 quantity of the DNA was checked using a DeNovix DS-11 Spectrophotometer, Qubit (High  
251 Sensitivity dsDNA assay, Q32854, Thermo Fisher), and by running a sample of the DNA on  
252 an agarose gel (1%) to visualise the high molecular weight DNA. Four bulks were assembled  
253 by pooling DNA from plants which had been scored as either “yellow” or “green” (K2282-  
254 28, N = 75 for yellow, N = 16 for green; K2282-23, N= 33 for yellow, N = 22 for green).

255 Equal quantities of DNA from the individual plants were pooled into each bulk to minimise  
256 bias.

257 Library preparation and sequencing was carried out at the Earlham Institute (Norwich, UK)  
258 as follows. DNA quality control was carried out using the High Sensitivity Qubit assay,  
259 before library preparation was carried out with a KAPA HTP Library Prep Kit. Size selection  
260 was carried out using Beckman Coulter XP beads, and DNA was sheared to approximately  
261 350 bp using the Covaris S2 sonicator. Four libraries were produced, one for each bulk  
262 detailed above, which were barcoded and pooled. Five cycles of PCR were carried out on the  
263 libraries before carrying out exome capture.

264 Hybridization to the wheat NimbleGen target capture, previously described in Krasileva *et al.*  
265 (2017), was carried out using the SeqCapEZ protocol v5.0, with the following changes: 2.8  
266  $\mu\text{L}$  of Universal Blocking Oligos was used, and the Cot-1 DNA was replaced with 14  $\mu\text{L}$  of  
267 Developer Reagent. Hybridisation was carried out at 47°C for 72 hours in a PCR machine  
268 with a lid heated to 57°C.

269 The library pool was diluted to 2 nM with NaOH and 10 $\mu\text{L}$  transferred into 990 $\mu\text{L}$  HT1  
270 (Illumina) to give a final concentration of 20pM. This was diluted further to an appropriate  
271 loading concentration in a volume of 120  $\mu\text{L}$  and spiked with 1% PhiX Control v3 before  
272 loading onto the Illumina cBot. The flow cell was clustered using HiSeq PE Cluster Kit v4,  
273 utilising the Illumina PE\_HiSeq\_Cluster\_Kit\_V4\_cBot\_recipe\_V9.0 method on the Illumina  
274 cBot. After clustering, the flow cell was loaded onto the Illumina HiSeq2500 instrument  
275 following the manufacturer's instructions. The sequencing chemistry used was HiSeq SBS  
276 Kit v4. The library pool was run on two lanes with 125 bp paired end reads. Reads in bcl  
277 format were demultiplexed using the 6 bp Illumina index by CASAVA 1.8, allowing for a  
278 one base-pair mismatch per library, and converted to FASTQ format by bcl2fastq.

## 279 **Chromosome flow-sorting and sequencing**

280 Seeds from the original K2282 M<sub>5</sub> mutant line were used for the chromosome sorting and  
281 sequencing to ensure all parental SNPs were included. Suspensions of intact mitotic  
282 chromosomes were prepared from synchronized root tip meristems according to (Vrána *et al.*,  
283 2000). To achieve better discrimination of individual chromosomes by flow cytometry, GAA  
284 microsatellite loci were fluorescently labelled by FISHIS (Giorgi *et al.*, 2013) using FITC-  
285 labelled (GAA)<sub>7</sub> oligonucleotides as described (Vrána *et al.*, 2016). Chromosomal DNA was  
286 then stained by 4',6-diamidino-2'-phenylindole (DAPI) at final concentration 2  $\mu\text{g}/\text{ml}$  and the  
287 chromosome suspensions were analysed by FACSARIA SORP II flow sorter (BD Biosciences,  
288 San Jose, USA) at rates of 1000-2000 particles/sec. Bivariate flow karyotypes DAPI vs.  
289 GAA-FITC were obtained and individual populations were flow sorted to identify the  
290 population representing chromosome 3A and to estimate the extent of contamination by other  
291 chromosomes (Supplementary Figure 2). Briefly, 2000 chromosomes were sorted onto a  
292 microscopic slide and evaluated by fluorescence microscopy after FISH with probes for GAA  
293 microsatellite and Afa-family repeat (Kubaláková *et al.*, 2002). Three batches of 30,000  
294 copies of chromosome 3A corresponding to ~50 ng of DNA each were then sorted into PCR  
295 tubes containing 40  $\mu\text{l}$  sterile deionized water. Chromosomal DNA was purified and  
296 amplified by Illustra GenomiPhi V2 DNA amplification Kit (GE Healthcare, Piscataway,  
297 USA) according to (Šimková *et al.*, 2008).

298 Library preparation and sequencing were carried out at Novogene. DNA integrity was  
299 confirmed on 1% agarose gels. A PCR-free library preparation was carried out, using the  
300 NEBNext Ultra II DNA Library Prep Kit for Illumina, following manufacturer's instructions.  
301 Libraries were sequenced using a HiSeqX platform, generating 150 bp paired end reads.

### 302 **Sequencing Alignments and SNP calling**

303 For the bulked segregant analysis, the raw Illumina reads were aligned to the Chinese Spring  
304 reference genome, RefSeqv1.0 (IWGSC et al., 2018), using bwa-mem (v 0.7.5) with the  
305 default settings (-k 20, -d 100) (Li, 2013). Alignments were sorted, indexed, and PCR  
306 duplicates removed using SAMtools (v 1.3.1) (Wysoker et al., 2009), and SNPs were called  
307 using freebayes (v 1.1.0, default settings) (Garrison and Marth, 2012). Depth of coverage was  
308 calculated using the exome capture size detailed previously (Krasileva et al., 2017)  
309 (Supplementary Table 2). Following SNP calling, we then filtered the original output to  
310 obtain only SNPs that were previously called in the K2282 parent line (Krasileva et al., 2017)  
311 using an original script available online to convert SNP coordinates to the RefSeq v1.0  
312 genome ([https://github.com/Uauy-Lab/K2282\\_scripts](https://github.com/Uauy-Lab/K2282_scripts)). The relative enrichment of each SNP  
313 in the yellow and green bulks was visualised across the wheat genome using the Circos  
314 package (Krzywinski et al., 2009). A schematic of the pipeline is provided in Supplemental  
315 Figure 3.

316 Following flow-sorting of chromosome 3A, reads were aligned to both RefSeq v1.0 and the  
317 Kronos assembly. We obtained access to the draft Kronos assembly produced at the Earlham  
318 Institute, which was assembled using the methods previously described (Clavijo et al., 2017a,  
319 Clavijo et al., 2017b). The Kronos assembly is available in advance of publication from  
320 Grassroots Genomics ([https://opendata.earlham.ac.uk/opendata/data/Triticum\\_turgidum/](https://opendata.earlham.ac.uk/opendata/data/Triticum_turgidum/)). In  
321 both cases, the alignment was carried out with bwa-mem (v 0.7.5; default settings -k 20, -d  
322 100) (Li, 2013). Illumina reads from the wild-type Kronos assembly were aligned to RefSeq  
323 v1.0 using hisat (v 2.0.4, default settings with -p 8) (Kim et al., 2015). In all cases, files were  
324 sorted, indexed, and PCR duplicates removed with SAMtools (v 1.3.1) (Wysoker et al.,  
325 2009). For alignments to RefSeq v1.0, depth of coverage across part 2 of chromosome 3A  
326 was calculated using genomic windows of 1 Mb (Supplementary Table 2). Depth of coverage  
327 was not calculated for the complete Kronos alignment, as the scaffolds are not associated  
328 with a chromosome. SNPs were called on the respective alignments using freebayes (v 1.1.0)  
329 at default settings in all cases. BCFtools (Wysoker et al., 2009) was used to filter the SNPs  
330 based on quality ( $QUAL \geq 20$ ), depth ( $DP > 10$ ), zygosity (only homozygous), and EMS-like  
331 status (G/A or C/T SNPs). SNPs were also manually filtered to remove those which were  
332 likely to be varietal SNPs initially missed in filtering or which fell into regions of  
333 unexpectedly high SNP density. We then identified scaffolds from the Kronos genome which  
334 fall within the *YES-I* locus in the Chinese Spring RefSeq v1.0 genome using BLAST  
335 (v2.2.30) (Altschul et al., 1990) against the gene sequences annotated within that region,  
336 using the v1.1 gene annotation. All further analysis of the SNP data for mapping and marker  
337 design focused solely on the 32.9 Mb *YES-I* region. A schematic of this workflow is  
338 provided in Supplementary Figure 4.

### 339 **KASP Marker Genotyping**

340 Markers were designed for the identified SNPs predominantly using the PolyMarker pipeline  
341 (Ramirez-Gonzalez et al., 2015b). Those not successful in PolyMarker were designed



342 manually to be homoeolog specific. Markers were run on the recombinant populations using  
343 KASP genotyping, as previously described (Ramirez-Gonzalez et al., 2015a). Markers  
344 specific to K2282 are listed in Supplementary Table 3. Markers used for *NAM-A1* genotyping  
345 were previously published (Harrington et al., 2019).

## 346 **Data Analysis**

347 Appropriate statistical tests for all data analyses were carried out and are detailed explicitly in  
348 the results section. When needed, adjustments for false discovery rate were carried out using  
349 the Benjamini-Hochberg adjustment. This is referred to in the results as “adjusted for FDR.”  
350 All statistics were carried out in R (v3.5.1) (R Core Team, 2018), and data was manipulated  
351 using packages tidyr (Wickham and Henry, 2018) and dplyr (Wickham et al., 2019). Graphs  
352 of phenotyping and expression data were produced using ggplot2 (Wickham, 2016) and  
353 gplots (Warnes et al., 2019), respectively.

## 354 **Results**

### 355 **A forward screen of the Kronos TILLING population identifies a line segregating for a** 356 **dominant chlorosis phenotype.**

357 951 M<sub>4</sub> lines of the Kronos TILLING population (Krasileva et al., 2017) were grown at the  
358 John Innes Centre (JIC) in 2015 and scored for flag leaf and peduncle senescence timing. Ten  
359 lines showed early senescence phenotypes, while 11 showed late senescence phenotypes  
360 relative to Kronos wild-type (Supplementary Figure 5, Supplementary Table 1). We  
361 developed F<sub>2</sub> populations for these 21 lines crossed to wild-type Kronos. In 2016 the F<sub>2</sub>  
362 mapping populations for 18 of these 21 lines were grown at JIC, and again scored for the  
363 senescence. From these populations, two showed significantly delayed peduncle senescence;  
364 K1107, with delayed peduncle senescence present in two independent F<sub>2</sub> populations, and  
365 K2711, with delayed peduncle senescence in one of two F<sub>2</sub> populations (Supplementary  
366 Figure 6) These two lines both contained mutations in the *NAM-A1* gene, known to be a  
367 positive regulator of senescence (Uauy et al., 2006). The presence of the *NAM-A1* mutation  
368 was sufficient to account for the variation in peduncle senescence timing found within the F<sub>2</sub>  
369 populations for both K1107 and K2711 (Tukey’s HSD,  $p < 0.01$ , Supplementary Figure 7),  
370 indicating that the *NAM-A1* SNPs were causal. The effect of the *NAM-A1* mutations was  
371 followed up separately (Harrington et al., 2019).

372 Based on the data from the 2016 field trials, we identified a single line, K2282, which  
373 showed a significant deviation in the timing of flag leaf senescence onset between the F<sub>2</sub>  
374 population and the wild-type controls ( $p < 0.001$ , Kolmogorov-Smirnov test, adjusted for  
375 FDR; Supplementary Figure 6). Two F<sub>2</sub> populations derived from K2282, K2282-28 and  
376 K2282-23, both showed earlier senescence compared to the wild-type controls. This  
377 phenotype, however, did not appear to be typical of a leaf senescence mutant. Although leaf  
378 senescence (scored based on leaf-tip necrosis) was indeed earlier in the K2282 populations,  
379 by anthesis the leaf tissue of individual plants was already highly chlorotic (Figure 1A).  
380 Quantification of chlorophyll levels confirmed that the yellow F<sub>2</sub> individuals from both  
381 populations contained significantly less pigment than green F<sub>2</sub> individuals ( $p < 0.05$ ,  
382 Student’s t-test, Figure 1B). We also observed that the chlorosis phenotype predominated in  
383 the interveinal regions in the yellow plants, leading to a characteristic striated phenotype  
384 (Supplementary Figure 8).

385 We scored the K2282 F<sub>2</sub> populations for chlorosis as a binary trait; *i.e.* plants were scored as  
386 yellow or green (see Fig. 1A for an image of yellow (MP/F<sub>2</sub>M) and green (WT) flag leaves).  
387 We confirmed that our visual scoring of the plants corresponded to the true chlorotic  
388 phenotype using non-destructive measurements of relative chlorophyll units. This identified a  
389 significant reduction in chlorophyll in the yellow (F<sub>2</sub>M) plants compared to the green (F<sub>2</sub>WT)  
390 plants, as expected ( $p < 0.001$ , Student's t-test; Figure 1C). After classifying the F<sub>2</sub>  
391 population into the green (F<sub>2</sub>WT) and yellow (F<sub>2</sub>M) groups, we found that the yellow group  
392 had significantly earlier leaf senescence (when scored to include necrotic symptoms) than the  
393 green group ( $p < 0.001$  Kolmogorov-Smirnov test, Fig 1D). The segregation of the chlorotic  
394 phenotype within the two populations was not significantly different from a 3:1 yellow to  
395 green ratio ( $X^2$ ,  $p = 0.07$ ; Figure 1E), consistent with the trait being underpinned by a single  
396 dominant locus, hereafter referred to as *Yellow Early Senescence 1* (*YES-1*).

### 397 **The *YES-1* locus maps to the long arm of chromosome 3A**

398 To map the trait, we carried out bulked segregant analysis on the two independent  
399 populations, K2282-28 and K2282-23. A diagram of the analysis pipeline used is provided in  
400 Supplementary Figure 3. Following library preparation and exome capture, reads were  
401 aligned against the RefSeqv1.0 genome (IWGSC et al., 2018) and SNPs were called  
402 (Supplementary Table 2). To reduce the number of false SNP calls, we initially filtered the  
403 SNPs to only include those previously identified in the original M<sub>2</sub> TILLING line (Krasileva  
404 et al., 2017). We recovered 1,548 SNPs out of the 3,060 SNPs present in the original K2282  
405 M<sub>2</sub> line which was sequenced. We expected to recover fewer SNPs than those identified in  
406 the original TILLING line as SNPs that were initially heterozygous in the M<sub>2</sub> generation,  
407 may have been lost in the following two generations. Similarly, ~50% of heterozygous  
408 mutations present in the M<sub>4</sub> line crossed to wild-type Kronos to produce the F<sub>2</sub> population  
409 would also have been lost.

410 We initially focussed our analysis on the K2282-28 population and calculated the ratio of the  
411 mutant (alternate) allele over total depth of coverage (AO/DP) at each SNP location in the  
412 yellow and green bulks (Figure 2A, inner track). From this, we then calculated the  $\Delta$  value  
413 representing the enrichment of the mutant allele in the yellow bulk compared to the green  
414 bulk (Figure 2A, outer track). The segregation ratio seen in the field suggested this is a  
415 dominant single locus trait. Hence, we assumed that the yellow bulk would contain  
416 individuals homozygous or heterozygous for the causal mutant allele, while the green bulk  
417 should only contain homozygous wild-type plants. As a result, the AO/DP value should  
418 approach 0 in the green bulk, and 0.66 in the mutant bulk, and thus have a  $\Delta$  value of 0.66.  
419 Using a conservative limit of 0.5 for the  $\Delta$  value (grey line, outer track of Figure 2A), we  
420 identified only one region, on Chromosome 3A, that was enriched for the mutant allele  
421 (Figure 2B). This result was consistent with that obtained from mapping carried out on the  
422 second population, K2282-23 (Supplementary Figure 9).

423 To validate this mapping, we developed KASP markers for the SNPs within and surrounding  
424 the region of interest (Figure 2C, Supplementary Table 3). Mapping of the individual F<sub>2</sub>  
425 plants which were used to perform the exome capture confirmed the location of the region of  
426 interest on the long arm of chromosome 3A. Using the recombination events within this  
427 region and requiring at least two independent F<sub>2</sub> plants to define the mapping interval, we

428 narrowed the *YES-1* region to between markers SH179 and SH969, a region of 32.9 Mb in the  
429 RefSeq v1.0 genome containing 345 genes (RefSeq v1.1 gene annotation) (Figure 2C).

#### 430 **Leaf chlorosis precedes anthesis but is inconsistent across environments.**

431 To further characterise the phenotype, individual lines which were genotyped as completely  
432 mutant or wild-type across the *YES-1* region were grown at the JIC in 2018. The mutant lines  
433 contained less chlorophyll A, B, and carotenoid pigment as early as the 3<sup>rd</sup> leaf stage (Zadoks  
434 13-14) (Student's t-test,  $p < 0.01$ ; Figure 3A). This difference was increased at anthesis  
435 (Student's t-test,  $p < 0.005$ ), at which stage there was a larger spread in pigment content  
436 within the mutant lines than the wild-type lines. Chlorophyll content, measured with SPAD  
437 units, was also monitored across the development of the plants, from 14 days before anthesis  
438 to 39 days post-anthesis. SPAD readings were consistently lower in the mutant lines up to 24  
439 days post anthesis ( $p < 0.01$ , Pairwise Wilcoxon Rank Sum adjusted for FDR). The chlorotic  
440 phenotype remained highly visible on the leaves of the mutant plants, compared to wild-type  
441 (shown at 20 DPA, Figure 3C). In both wild-type and mutant lines, the level of chlorophyll in  
442 the flag leaf peaked at approximately 6 DPA (Figure 3B). No significant decline in SPAD  
443 units was observed in the wild-type plants until 24 DPA ( $p < 0.01$ , Pairwise Wilcoxon Rank  
444 Sum adjusted for FDR). In contrast, the mutant plants contained significantly less chlorophyll  
445 at 18 DPA compared to the peak at 6 DPA ( $p < 0.01$ , Pairwise Wilcoxon Rank Sum adjusted  
446 for FDR). Despite this earlier onset of senescence, the mutant lines continued to lose  
447 chlorophyll until the final stage of the time course (39 DPA), in line with the wild-type  
448 plants. We also found that the chlorosis phenotype is associated with significant decreases in  
449 leaf mineral content, with chlorotic leaves containing less magnesium at the 3<sup>rd</sup> leaf stage,  
450 and less of all four measured minerals at anthesis (Mg, Fe, Zn,  $p < 0.05$ ; Mn,  $p = 0.05$ ;  
451 Supplementary Figure 10).

452 Mutant and wild-type lines were also grown at UC Davis during the summer of 2016. Unlike  
453 in the UK, no chlorosis or senescence phenotype was observed either through visual or SPAD  
454 scoring (Supplementary Figure 11). This suggested that the causal locus underpinning *YES-1*  
455 is environmentally dependent. Given the similarity between the interveinal chlorosis  
456 phenotype observed in the *YES-1* mutant plants to that seen in plants with varying forms of  
457 nutrient deficiency (Snowball and Robson, 1991) and the decrease in leaf mineral content  
458 seen in the mutant plants (Supplementary Figure 8), we hypothesized that the environmental  
459 variation in phenotype may be due to nutrient content in the soil. To test this, F<sub>3</sub> plants fully  
460 mutant across the *YES-1* region were grown under glasshouse conditions in three soil types:  
461 standard glasshouse cereal mix, soil taken from the JIC field site in 2017, and horticultural  
462 sand supplemented with nutrient-replete Hoagland solution. However, none of the three  
463 conditions tested recapitulated the yellowing phenotype observed in the field (Supplementary  
464 Figure 12). This was surprising given the consistency of the phenotype at the JIC field site  
465 across four different fields during four successive field seasons (2015-2018).

466 We then investigated weather-related environmental variation across the two field sites and  
467 across years. We obtained rainfall and temperature data from Davis, CA, for the 2016-2017  
468 growing season, and from the JIC field site for the 2016, 2017, and 2018 growing seasons.  
469 The trials carried out in California in 2017 received substantially more rainfall between  
470 sowing and heading than in any of the JIC trials (Supplementary Table 4, Supplementary  
471 Figure 13). This suggested that perhaps reduced rain levels were correlated with the

472 appearance of the mutant yellow phenotype. However, attempts to recapitulate the yellowing  
473 phenotype in the glasshouse through reduced watering of plants was also unsuccessful, as no  
474 early chlorosis or senescence was observed under different watering conditions  
475 (Supplementary Figure 12).

#### 476 **Fine-mapping reduces the *YES-1* locus to 4 Mb on chromosome 3A**

477 To identify further SNPs within the *YES-1* locus, we purified chromosome 3A from the  
478 K2282 mutant by flow cytometric sorting. However, as the population of 3A chromosomes  
479 partially overlapped with the population of 7A chromosomes on a bivariate flow karyotype  
480 DAPI vs. GAA-FITC (Supplementary Figure 2), flow-sorted fractions comprised 80% of  
481 chromosome 3A and 20% of chromosome 7A as determined by microscopic observation. For  
482 sequencing, three batches of 30,000 chromosomes (~50 ng) were flow-sorted and subsequent  
483 DNA amplification of three independent samples resulted in a total of 4.51 µg DNA.

484 Following sequencing, reads were mapped against the A and B genomes of the wheat RefSeq  
485 v1.0 genome. 60.38% of reads aligned to chromosome 3A while 25.37% aligned to  
486 chromosome 7A, consistent with the expected contamination. The remaining reads (14.25%)  
487 mapped against the rest of the genome. We obtained on average 82X coverage across  
488 chromosome 3A, using genomic windows of 1 Mb.

489 In order to maximise our ability to discover novel SNPs in the *YES-1* region, we carried out a  
490 simultaneous approach to SNP discovery utilising both the Chinese Spring reference genome  
491 as well as the draft Kronos assembly, as depicted in Supplementary Figure 4. In brief, paired  
492 end sequencing of the K2282 mutant chromosome 3A was used to obtain high-quality SNPs  
493 outside of the previously captured exome. We used the Kronos assembly to identify SNPs in  
494 non-coding regions that are less conserved between the Kronos and Chinese Spring cultivars.  
495 In tandem, we took advantage of the contiguity of the RefSeq v1.0 genome facilitated the  
496 identification of high-quality SNPs in and around all genes within the *YES-1* locus.

497 Reads from the mutant chromosome 3A were mapped against the draft Kronos assembly and  
498 were filtered for homozygous, EMS-like SNPs, passing minimum quality and depth  
499 thresholds. To obtain only SNPs that fell within the physical region encompassed by the *YES-*  
500 *1* locus, we carried out a BLAST between the Kronos scaffolds which contained SNPs and  
501 the Chinese Spring gene sequences within part of the *YES-1* region. Conducting a BLAST  
502 against gene sequences within the *YES-1* region, rather than the entirety of the region,  
503 reduced the number of scaffolds that mapped to the *YES-1* region due to shared repetitive  
504 sequences rather than true synteny. Based on recombination seen in individual plants, we  
505 focussed on a region encompassing markers SH179 and SH838, approximately 16 Mb in  
506 size. Within this region, we identified 18 unique Kronos scaffolds which both contained  
507 SNPs and at least one gene found in the RefSeq v1.0 *YES-1* physical interval (Supplementary  
508 Table 5). 26 of the genes within the *YES-1* region in Chinese Spring were identified (out of  
509 345 total) within these 18 Kronos scaffolds. Genes that were not identified in the Kronos  
510 scaffolds may fall in scaffolds that contained no high-quality SNPs, may be split across  
511 multiple scaffolds, or may be absent from the Kronos genome. The SNPs within these  
512 scaffolds were manually curated, to exclude any regions that contained an unexpectedly high  
513 density of SNPs, leaving a final list of 16 scaffolds containing high-quality SNPs  
514 (Supplementary Table 5). The SNPs underlying markers SH838 and SH179, initially  
515 identified in the exome capture data, were also recovered in the Kronos genome, validating



516 the use of this method. KASP primers were designed for a subset of the SNPs and were used,  
517 together with the previous phenotypic data, to map *YES-1* to a 6.6 Mb region between  
518 markers SH123480 and SH59985 (Figure 4A).

519 To obtain more markers across the region, we also called SNPs against the Chinese Spring  
520 reference. To account for varietal SNPs between Kronos and Chinese Spring, we aligned raw  
521 reads from wild-type Kronos to the RefSeq v1.0 genome. Using a subset of reads, we  
522 obtained a coverage of approximately 30X across chromosome 3A. SNP calling was then  
523 carried out against RefSeq v1.0 to obtain a list of varietal SNPs between Chinese Spring and  
524 Kronos. A total of 968,482 homozygous SNPs with quality greater than 20 and depth of  
525 coverage greater than 10 were identified across the second part of chromosome 3A,  
526 encompassing *YES-1*.

527 SNPs were then called between the K2282 mutant chromosome 3A reads and the RefSeq  
528 v1.0 genome. The set of SNPs was filtered for quality and depth and to exclude the varietal  
529 SNPs identified above. Following this filtering, a total of 7,153 SNPs were identified between  
530 markers SH123480 and SH969, a region of approximately 30 Mb. This is substantially more  
531 SNPs than would be expected from the known mutation density of 23 mutations/Mb for the  
532 Kronos TILLING lines (Krasileva et al., 2017). However, SNP density across the region was  
533 highly irregular which we hypothesised was due to mismapping and spurious SNP calling in  
534 repetitive regions.

535 To reduce the impact of repetitive regions on SNP calling, we extracted SNPs only from  
536 regions encompassing 1 Kb up and downstream of annotated genes within the *YES-1* region.  
537 Following manual curation of SNPs, we identified a set of 15 SNPs that were located near  
538 genes within the annotated region (Supplementary Table 6). Of these SNPs, three were  
539 located in gene bodies (including the known TILLING SNP SH838), while the remainder  
540 were intronic (5) or fell in the promoter (5) or 3' UTR (2). Note that some SNPs are in  
541 sufficient proximity to two gene models to be counted twice. Of the mutations in the coding  
542 region, SH838 and SH858 are both missense variants with low SIFT scores (0.00 and 0.03  
543 respectively), while SH567 is a synonymous mutation. We designed markers based on these  
544 new SNPs and based on the JIC 2017 and 2018 phenotypic data we mapped *YES-1* to a 4.3  
545 Mb interval, between markers SH044 and SH59985 (Figure 4A).

#### 546 **Genes within the region**

547 Within this region we identified 59 high-confidence genes based on the RefSeq v1.1 gene  
548 annotation (Supplementary Table 7). Using developmental time course data from two wheat  
549 varieties (Chinese Spring and Azhurnaya) (Borrill et al., 2016, Ramírez-González et al.,  
550 2018), we found that 25 genes within the region are expressed above 0.5 transcripts per  
551 million (TPM) in at least one stage of leaf or shoot tissue during development, consistent with  
552 our observation of a leaf-based phenotype (Figure 4). Of these genes, 18 were expressed  
553 above 0.5 TPM in leaf and shoot tissue during both vegetative and reproductive stages  
554 (Supplementary Table 7). This set of genes includes a putative magnesium transporter,  
555 TraesCS3A02G414000 (Gebert et al., 2009), which contains a missense mutation in the first  
556 exon of the gene which is predicted to be highly deleterious (SIFT = 0). This is the only gene  
557 within the 4 Mb region that contains a coding-region SNP, however no chlorosis phenotype  
558 was observed for any other line mutated in this gene (Supplemental Table 8). Within the 59  
559 total candidate genes, five genes were found to have senescence-related functions in their

560 closest rice orthologues. A set of four tandem duplicated genes, TraesCS3A02G412900 to  
561 TraesCS3A02G413200, are orthologues to the rice gene *OsSAG12-1*, a negative regulator of  
562 senescence (Singh et al., 2013). A fifth gene, TraesCS3A02G410800, is orthologous to  
563 *Tryptophan Decarboxylase 2*, a rice gene that causes higher serotonin levels and delayed leaf  
564 senescence when over-expressed (Kang et al., 2009). All five genes with senescence-related  
565 phenotypes are lowly expressed or non-expressed across the set of tissues and developmental  
566 stages considered. However, the majority of the genes within the region are un-annotated and  
567 lack orthologous copies in either rice or Arabidopsis.

## 568 Discussion

569 Here we have fine-mapped a region causing a dominant, environmentally dependent early-  
570 chlorosis phenotype. We have taken advantage of the recently released genetic and genomic  
571 resources for wheat to increase our ability to identify SNPs *de novo* in a Kronos TILLING  
572 mutant line. We have shown how the use of cultivar specific genome assemblies can be used  
573 to increase the ability to identify high-quality SNPs in non-genic regions which are often  
574 relatively less conserved between varieties than coding sequences.

## 575 Induced SNP variation can lead to novel dominant phenotypes

576 Many of the critical domestication alleles in polyploid wheat are derived from dominant  
577 mutations (Borrill et al., 2015, Uauy et al., 2017). This includes genes with critical variation  
578 in flowering time and free-threshing alleles resulting from dominant mutations (Fu et al.,  
579 2005, Yan et al., 2004, Simons et al., 2006, Greenwood et al., 2017). In wheat, the high level  
580 of redundancy between homoeologous genes adds to the importance of identifying dominant  
581 alleles to develop novel traits. Dominant alleles have retained their importance in modern  
582 breeding programs, underpinning the Green Revolution via the dominant dwarfing *Rht-1*  
583 allele (Peng et al., 1999, Borrill et al., 2015). Most traits selected for in modern breeding  
584 programs, however, lack standing variation of dominant alleles in both the modern breeding  
585 pool and in older wheat landraces and progenitors. Instead, forward screens for phenotypes of  
586 interest typically identify multiple quantitative trait loci (QTL) that each contribute towards a  
587 small portion of the desired phenotype. These more complex effects, often caused by loss of  
588 function mutations, are inherently more difficult to identify due to the need to  
589 acquire/combine mutations in both or all homoeologous copies of a gene to attain a clear  
590 phenotypic effect (Borrill et al., 2015, Borrill et al., 2019).

591 Here we have demonstrated that novel dominant alleles can be identified in chemically-  
592 mutagenised TILLING populations (Krasileva et al., 2017). Forward screens of the TILLING  
593 population are most likely to identify novel traits caused by dominant mutations, given the  
594 low likelihood of obtaining simultaneous mutations in multiple homoeologous copies of the  
595 same gene. Indeed, the fact that mutations in *NAM-A1* underpinned the only other senescence  
596 phenotype identified during this forward screen underscores this. The B-genome homoeolog  
597 of *NAM-A1* is non-functional in Kronos; as a result, a single mutation in the A-homoeolog  
598 equates to a complete null and was sufficient to show a strong and consistent phenotype  
599 (Pearce et al., 2014, Harrington et al., 2019).

600 The dominant phenotype identified in the K2282 line was particularly clear in that individual  
601 plants could unambiguously be scored for a binary green/yellow trait. However, we suggest  
602 that the TILLING population is equally well suited for forward genetic screens to identify

603 novel dominant alleles governing other phenotypes. Recently, the Kronos TILLING  
604 population was used to identify a line which contained a deletion of *Rht-B1*, the partially-  
605 dominant dwarfing allele (Mo et al., 2018). Here we have identified a novel dominant allele  
606 with no previously characterised genes located within the candidate region. This highlights  
607 the potential for novel dominant alleles to be identified in populations with induced variation,  
608 such as the Kronos and Cadenza TILLING populations (Krasileva et al., 2017).

#### 609 **The use of cultivar-specific assemblies facilitates the identification of non-genic SNPs**

610 A complication of working with dominant induced variation, however, is that dominant  
611 mutations may often act through changes to regulatory elements. Variation in the promoter  
612 and intron sequence of the flowering time gene *VRN1* underpins the transition from winter to  
613 spring growth habit in wheat and barley (Yan et al., 2004, Fu et al., 2005). More recently,  
614 CRISPR editing has been used in tomato to edit the promoter region of various yield-related  
615 genes, leading to a high level of variation in trait morphology (Rodríguez-Leal et al., 2017).  
616 These results, amongst many others, highlight the potential importance of non-coding regions  
617 in regulating agronomically-relevant traits. However, many reduced representation methods  
618 focus on enrichment of coding regions (Borrill et al., 2019). Such methods of genome  
619 complexity reduction, therefore, are less likely to contain the information needed to identify a  
620 dominant causal SNP in a regulatory region. Compounding this difficulty is the fact that non-  
621 coding regions of the genome are typically less conserved between cultivars. As a result, SNP  
622 identification against the reference variety may fail to identify critical SNPs or, conversely,  
623 identify a large number of spurious SNPs.

624 We have shown here that the draft Kronos assembly can instead be used, alongside non-  
625 biased methods of genome size reduction (e.g. chromosome flow sorting), to identify  
626 cultivar-specific SNPs in non-coding regions of the genome. We started by calling SNPs  
627 against scaffolds of the Kronos assembly, obtaining a large amount of SNP variation between  
628 the wild-type and mutant lines. Once we had this data, we then positioned the scaffolds which  
629 contained SNPs against the reference genome, identifying the SNPs which were located  
630 within our region of interest (here *YES-1*). This approach overcame two of the main  
631 drawbacks to using the reference genome and the Kronos assembly. On one hand, the  
632 reference genome would be expected to have different sequence content to another variety,  
633 such as Kronos, limiting its utility for SNP identification. On the other hand, unlike the gold-  
634 standard reference genome, the Kronos assembly doesn't have long-range assemblies needed  
635 to obtain positional information for SNPs. Long-range contiguous assemblies of additional  
636 cultivars, such as the recently published Svevo genome (Maccaferri et al., 2019), will greatly  
637 improve this current limitation. Until then, using variety-specific genomes, such as those  
638 being produced by the 10+ Wheat Genomes project, alongside the highly contiguous  
639 reference genomes will facilitate the identification of non-genic SNPs.

#### 640 **Variability in phenotype points to an environmentally-dependent causal locus.**

641 The early chlorosis and senescence phenotype caused by the *YES-1* locus was consistent  
642 across four years in field trials at the JIC. However, mutant lines showed no evidence of a  
643 chlorotic phenotype when grown in Davis, CA. Comparison of rainfall and temperature  
644 patterns between the years and locations highlighted the fact that the plants received a high  
645 level of rainfall in Davis before flowering, substantially more than that received in any of the  
646 years at the JIC (Supplementary Table 4). This was due to the highly unusual wet winter that

647 occurred in California in 2016/2017, with an average rainfall of 781 mm across the state from  
648 October 2016 to March 2017 (NOAA National Centers for Environmental Information,  
649 2017). This suggested initially that the chlorosis response may be a response to higher water  
650 stress, yet we were unable to recapitulate the phenotype when grown in the glasshouse under  
651 different watering conditions.

652 We also considered whether the phenotype was due to variation in soil nutrient content. The  
653 presence of a missense mutation within the coding region of a putative  $Mg^{2+}$  transporter  
654 (Gebert et al., 2009) highlighted this as a promising candidate gene. Similarly, the observed  
655 interveinal chlorosis phenotype (Supplementary Figure 8) is reminiscent of that characteristic  
656 of a magnesium deficiency (Snowball and Robson, 1991). However, we failed to recapitulate  
657 the phenotype when grown in the glasshouse using soil taken from the field at JIC, and which  
658 should thus have the same nutrient composition. Compounding this, we found that Kronos  
659 TILLING lines which contained other SNPs within the transporter gene sequence did not  
660 show the same chlorotic phenotype (Supplementary Table 8). This included lines with both  
661 missense and premature stop codon mutations which lacked the exon containing the  
662 identified SNP in K2282. This implies that, if the magnesium transporter were the cause of  
663 the *YES-1* phenotype, the specific missense mutation present in K2282 has a unique ability to  
664 cause a dominant change in function. As the transporter is predicted to function in a hexamer,  
665 it is possible that the mutation could be sufficient to prevent the hexamer to function  
666 effectively once formed, but not sufficient to prevent the mutant monomer from being  
667 incorporated into the hexamer. In this way it may be possible that plants heterozygous for the  
668 mutation show an equally strong phenotype as homozygous mutants as incorporation of a  
669 mutant monomer disrupts completely the function of the hexameric complex. This hypothesis  
670 could be tested in the future using Cas9-driven base editing in wheat to recapitulate the exact  
671 mutation in an independent background (Zong et al., 2017).

672 An alternative possibility is that a separate SNP located in a regulatory region may be acting  
673 either on the identified magnesium transporter, or on a separate, currently uncharacterised  
674 gene. Few dominant chlorosis phenotypes have previously been reported in the literature. A  
675 dominant chlorosis phenotype was previously reported in *Brassica napus*, however this  
676 phenotype disappeared after budding unlike here, where the yellowing phenotype became  
677 increasingly strong post-heading (Wang et al., 2016). In wheat, a *Ygm* (yellow-green leaf  
678 colour) mutant has been identified with a semi-dominant phenotype where the heterozygous  
679 plants are an intermediate yellow-green colour between the wild-type and homozygous  
680 mutant plants (Wu et al., 2018). This phenotype is underpinned by abnormal chloroplast  
681 development and is associated with differential expression of genes involved in chlorophyll  
682 biosynthesis and carbon fixation, amongst other traits. Further work to fine-map the *YES-1*  
683 locus will hopefully shed light on the specific causal SNP underpinning the environmentally-  
684 dependent chlorosis phenotype observed here, as well as on mechanisms governing dominant  
685 traits in polyploid wheat.

## 686 **Acknowledgements**

687 We would like to acknowledge A. Smith and M. Banfield (JIC) for helpful input during this  
688 project. We thank J. Vrána, M. Kubaláková and R. Šperková (IEB) for assistance with  
689 chromosome flow sorting and chromosome DNA amplification. The authors also thank J.  
690 Dubcovsky (UC Davis) for hosting the field trials at the University of California, Davis in



691 2016-2017. We also acknowledge the help of the field and glasshouse teams at the JIC and  
692 the University of California, Davis, as well as the help of G. Chilvers at the University of  
693 East Anglia ICP-OES platform. Finally, we thank B. Clavijo and the wheat pan-genome team  
694 at the Earlham Institute for allowing the use of the Kronos assembly before final publication.

### 695 **Author Contributions**

696 CU and PB conceived the study; SAH, PB, and NC carried out the field trials and  
697 phenotyping; SAH carried out the mapping; MK and JD flow-sorted chromosome 3A  
698 determined the purity in flow-sorted fractions and amplified chromosomal DNA for  
699 sequencing. SAH and CU wrote the manuscript, and all authors have read and approved the  
700 final manuscript.

### 701 **Conflict of Interest Statement**

702 The authors have no conflicts of interest to report.

### 703 **Data Availability Statement**

704 The raw reads from the exome capture and the flow-sorting experiments have been deposited  
705 on the SRA (PRJNA540141). The Kronos assembly is available from  
706 [http://opendata.earlham.ac.uk/Triticum\\_turgidum/](http://opendata.earlham.ac.uk/Triticum_turgidum/). Bespoke codes used for coordinate  
707 conversion are stored on Github ([https://github.com/Uauy-Lab/K2282\\_scripts](https://github.com/Uauy-Lab/K2282_scripts)).

### 708 **Funding Disclosure**

709 This work was supported by the UK Biotechnology and Biological Sciences Research  
710 Council (BBSRC) through the Designing Future Wheat (BB/P016855/1) and GEN  
711 (BB/P013511/1) ISPs and an Anniversary Future Leader Fellowship to PB (BB/M014045/1).  
712 SAH was supported by the John Innes Foundation. MK and JD were supported from ERDF  
713 project "Plants as a tool for sustainable global development" (No.  
714 CZ.02.1.01/0.0/0.0/16\_019/0000827). NC acknowledges the funding received from Fulbright  
715 and Comisión Nacional de Investigación Científica y Tecnológica (CONICYT) Becas-Chile  
716 72111195. This research was also supported in part by the NBI Computing infrastructure for  
717 Science (CiS) group through the HPC resources.

### 718 **References**

- 719 10+ WHEAT GENOMES PROJECT. 2016. *The Wheat 'Pan Genome'* [Online]. Available:  
720 <http://www.10wheatgenomes.com/> [Accessed 2019].
- 721 ACEVEDO-GARCIA, J., SPENCER, D., THIERON, H., REINSTÄDLER, A., HAMMOND-KOSACK, K.,  
722 PHILLIPS, A. L. & PANSTRUGA, R. 2017. mlo-based powdery mildew resistance in hexaploid  
723 bread wheat generated by a non-transgenic TILLING approach. *Plant Biotechnology Journal*,  
724 15, 367-378.
- 725 ALTSCHUL, S. F., GISH, W., MILLER, W., MYERS, E. W. & LIPMAN, D. J. 1990. Basic local alignment  
726 search tool. *Journal of Molecular Biology*, 215, 403-410.
- 727 AVNI, R., ZHAO, R., PEARCE, S., JUN, Y., UAUY, C., TABBITA, F., FAHIMA, T., SLADE, A., DUBCOVSKY, J.  
728 & DISTELFELD, A. 2014. Functional characterization of *GPC-1* genes in hexaploid wheat.  
729 *Planta*, 239, 313-324.
- 730 BORRILL, P., ADAMSKI, N. & UAUY, C. 2015. Genomics as the key to unlocking the polyploid potential  
731 of wheat. *New Phytologist*, 208, 1008-1022.

- 732 BORRILL, P., HARRINGTON, S. A., SIMMONDS, J. & UAUY, C. 2018. Identification of transcription  
733 factors regulating senescence in wheat through gene regulatory network modelling. *bioRxiv*,  
734 456749.
- 735 BORRILL, P., HARRINGTON, S. A. & UAUY, C. 2019. Applying the latest advances in genomics and  
736 phenomics for trait discovery in polyploid wheat. *The Plant Journal*, 97, 56-72.
- 737 BORRILL, P., RAMIREZ-GONZALEZ, R. & UAUY, C. 2016. expVIP: a Customizable RNA-seq Data  
738 Analysis and Visualization Platform. *Plant Physiology*, 170, 2172.
- 739 BRINTON, J. & UAUY, C. 2019. A reductionist approach to dissecting grain weight and yield in wheat.  
740 *Journal of Integrative Plant Biology*, 61, 337-358.
- 741 CLARK, J. W. & DONOGHUE, P. C. J. 2018. Whole-Genome Duplication and Plant Macroevolution.  
742 *Trends in Plant Science*, 23, 933-945.
- 743 CLAVIJO, B. J., GARCIA ACCINELLI, G., WRIGHT, J., HEAVENS, D., BARR, K., YANES, L. & DI-PALMA, F.  
744 2017a. W2RAP: a pipeline for high quality, robust assemblies of large complex genomes  
745 from short read data. *bioRxiv*, 110999.
- 746 CLAVIJO, B. J., VENTURINI, L., SCHUDOMA, C., ACCINELLI, G. G., KAITHAKOTTIL, G., WRIGHT, J.,  
747 BORRILL, P., KETTLEBOROUGH, G., HEAVENS, D., CHAPMAN, H., LIPSCOMBE, J., BARKER, T.,  
748 LU, F.-H., MCKENZIE, N., RAATS, D., RAMIREZ-GONZALEZ, R. H., COINCE, A., PEEL, N.,  
749 PERCIVAL-ALWYN, L., DUNCAN, O., TRÖSCH, J., YU, G., BOLSER, D. M., NAMAATI, G.,  
750 KERHORNOU, A., SPANNAGL, M., GUNDLACH, H., HABERER, G., DAVEY, R. P., FOSKER, C.,  
751 PALMA, F. D., PHILLIPS, A. L., MILLAR, A. H., KERSEY, P. J., UAUY, C., KRASILEVA, K. V.,  
752 SWARBRECK, D., BEVAN, M. W. & CLARK, M. D. 2017b. An improved assembly and  
753 annotation of the allohexaploid wheat genome identifies complete families of agronomic  
754 genes and provides genomic evidence for chromosomal translocations. *Genome Research*,  
755 27, 885-896.
- 756 DODSWORTH, S., CHASE, M. W. & LEITCH, A. R. 2016. Is post-polyploidization diploidization the key  
757 to the evolutionary success of angiosperms? *Botanical Journal of the Linnean Society*, 180, 1-  
758 5.
- 759 DOLEŽEL, J., VRÁNA, J., ŠAFÁŘ, J., BARTOŠ, J., KUBALÁKOVÁ, M. & ŠIMKOVÁ, H. 2012. Chromosomes  
760 in the flow to simplify genome analysis. *Functional & Integrative Genomics*, 12, 397-416.
- 761 DUBCOVSKY, J. & DVORAK, J. 2007. Genome Plasticity a Key Factor in the Success of Polyploid Wheat  
762 Under Domestication. *Science*, 316, 1862.
- 763 FU, D., SZÚCS, P., YAN, L., HELGUERA, M., SKINNER, J. S., VON ZITZEWITZ, J., HAYES, P. M. &  
764 DUBCOVSKY, J. 2005. Large deletions within the first intron in VRN-1 are associated with  
765 spring growth habit in barley and wheat. *Molecular Genetics and Genomics*, 273, 54-65.
- 766 GARRISON, E. & MARTH, G. 2012. Haplotype-based variant detection from short-read sequencing.  
767 *arXiv e-prints* [Online]. Available: <https://ui.adsabs.harvard.edu/abs/2012arXiv1207.3907G>  
768 [Accessed July 01, 2012].
- 769 GEBERT, M., MESCHENMOSER, K., SVIDOVÁ, S., WEGHUBER, J., SCHWEYEN, R., EIFLER, K., LENZ, H.,  
770 WEYAND, K. & KNOOP, V. 2009. A Root-Expressed Magnesium Transporter of the  
771 *MRS2/MGT* Gene Family in *Arabidopsis thaliana* Allows for Growth in Low-Mg<sup>2+</sup>  
772 Environments. *The Plant Cell*, 21, 4018.
- 773 GIORGI, D., FARINA, A., GROSSO, V., GENNARO, A., CEOLONI, C. & LUCRETTI, S. 2013. FISHIS:  
774 Fluorescence In Situ Hybridization in Suspension and Chromosome Flow Sorting Made Easy.  
775 *PLOS ONE*, 8, e57994.
- 776 GREENWOOD, J. R., FINNEGAN, E. J., WATANABE, N., TREVASKIS, B. & SWAIN, S. M. 2017. New  
777 alleles of the wheat domestication gene *Q* reveal multiple roles in growth and reproductive  
778 development. *Development*, 144, 1959.
- 779 HARRINGTON, S. A., OVEREND, L. E., COBO, N., BORRILL, P. & UAUY, C. 2019. Conserved residues in  
780 the wheat (*Triticum aestivum*) NAM-A1 NAC domain are required for protein binding and  
781 when mutated lead to delayed peduncle and flag leaf senescence. *bioRxiv*, 573881.

- 782 HOAGLAND, D. R. & ARNON, D. I. 1950. The water-culture method for growing plants without soil.  
783 *Circular. California Agricultural Experiment Station*, 347, 32 pp.
- 784 HUANG, X., FENG, Q., QIAN, Q., ZHAO, Q., WANG, L., WANG, A., GUAN, J., FAN, D., WENG, Q.,  
785 HUANG, T., DONG, G., SANG, T. & HAN, B. 2009. High-throughput genotyping by whole-  
786 genome resequencing. *Genome Research*, 19, 1068-1076.
- 787 IWGSC, APPELS, R., EVERSOLE, K., STEIN, N., FEUILLET, C., KELLER, B., ROGERS, J., POZNIAK, C. J.,  
788 CHOULET, F., DISTELFELD, A., POLAND, J., RONEN, G., SHARPE, A. G., BARAD, O., BARUCH, K.,  
789 KEEBLE-GAGNÈRE, G., MASCHER, M., BEN-ZVI, G., JOSSELIN, A.-A., HIMMELBACH, A.,  
790 BALFOURIER, F., GUTIERREZ-GONZALEZ, J., HAYDEN, M., KOH, C., MUEHLBAUER, G., PASAM,  
791 R. K., PAUX, E., RIGAULT, P., TIBBITS, J., TIWARI, V., SPANNAGL, M., LANG, D., GUNDLACH, H.,  
792 HABERER, G., MAYER, K. F. X., ORMANBEKOVA, D., PRADE, V., ŠIMKOVÁ, H., WICKER, T.,  
793 SWARBRECK, D., RIMBERT, H., FELDER, M., GUILHOT, N., KAITHAKOTTIL, G., KEILWAGEN, J.,  
794 LEROY, P., LUX, T., TWARDZIOK, S., VENTURINI, L., JUHÁSZ, A., ABROUK, M., FISCHER, I.,  
795 UAUY, C., BORRILL, P., RAMIREZ-GONZALEZ, R. H., ARNAUD, D., CHALABI, S., CHALHOUB, B.,  
796 CORY, A., DATLA, R., DAVEY, M. W., JACOBS, J., ROBINSON, S. J., STEUERNAGEL, B., VAN EX,  
797 F., WULFF, B. B. H., BENHAMED, M., BENDAHMANE, A., CONCIA, L., LATRASSE, D., BARTOŠ,  
798 J., BELLEC, A., BERGES, H., DOLEŽEL, J., FRENKEL, Z., GILL, B., KOROL, A., LETELLIER, T., OLSEN,  
799 O.-A., SINGH, K., VALÁRIK, M., VAN DER VOSSEN, E., VAUTRIN, S., WEINING, S., FAHIMA, T.,  
800 GLIKSON, V., RAATS, D., ČÍHALÍKOVÁ, J., TOEGELOVÁ, H., VRÁNA, J., SOURDILLE, P., DARRIER,  
801 B., BARABASCHI, D., CATTIVELLI, L., HERNANDEZ, P., GALVEZ, S., BUDAK, H., JONES, J. D. G.,  
802 WITEK, K., YU, G., et al. 2018. Shifting the limits in wheat research and breeding using a fully  
803 annotated reference genome. *Science*, 361, eaar7191.
- 804 JUPE, F., WITEK, K., VERWEIJ, W., SLIWKA, J., PRITCHARD, L., ETHERINGTON, G. J., MACLEAN, D.,  
805 COCK, P. J., LEGGETT, R. M., BRYAN, G. J., CARDLE, L., HEIN, I. & JONES, J. D. G. 2013.  
806 Resistance gene enrichment sequencing (RenSeq) enables reannotation of the NB-LRR gene  
807 family from sequenced plant genomes and rapid mapping of resistance loci in segregating  
808 populations. *The Plant journal : for cell and molecular biology*, 76, 530-544.
- 809 KANG, K., KIM, Y.-S., PARK, S. & BACK, K. 2009. Senescence-Induced Serotonin Biosynthesis and Its  
810 Role in Delaying Senescence in Rice Leaves. *Plant Physiology*, 150, 1380.
- 811 KIM, D., LANGMEAD, B. & SALZBERG, S. L. 2015. HISAT: a fast spliced aligner with low memory  
812 requirements. *Nature Methods*, 12, 357.
- 813 KRASILEVA, K. V., VASQUEZ-GROSS, H. A., HOWELL, T., BAILEY, P., PARAISO, F., CLISSOLD, L.,  
814 SIMMONDS, J., RAMIREZ-GONZALEZ, R. H., WANG, X., BORRILL, P., FOSKER, C., AYLING, S.,  
815 PHILLIPS, A. L., UAUY, C. & DUBCOVSKY, J. 2017. Uncovering hidden variation in polyploid  
816 wheat. *Proceedings of the National Academy of Sciences*, 114, E913.
- 817 KRZYWINSKI, M., SCHEIN, J., BIROL, I., CONNORS, J., GASCOYNE, R., HORSMAN, D., JONES, S. J. &  
818 MARRA, M. A. 2009. Circos: An information aesthetic for comparative genomics. *Genome  
819 Research*, 19, 1639-1645.
- 820 KUBALÁKOVÁ, M., VRÁNA, J., ČÍHALÍKOVÁ, J., ŠIMKOVÁ, H. & DOLEŽEL, J. 2002. Flow karyotyping  
821 and chromosome sorting in bread wheat (*Triticum aestivum* L.). *Theoretical and Applied  
822 Genetics*, 104, 1362-1372.
- 823 LI, H. 2013. Aligning sequence reads, clone sequences and assembly contigs with BWA-MEM. *arXiv e-  
824 prints* [Online]. Available: <https://ui.adsabs.harvard.edu/abs/2013arXiv1303.3997L>  
825 [Accessed March 01, 2013].
- 826 MACCAFERRI, M., HARRIS, N. S., TWARDZIOK, S. O., PASAM, R. K., GUNDLACH, H., SPANNAGL, M.,  
827 ORMANBEKOVA, D., LUX, T., PRADE, V. M., MILNER, S. G., HIMMELBACH, A., MASCHER, M.,  
828 BAGNARESI, P., FACCIOLI, P., COZZI, P., LAURIA, M., LAZZARI, B., STELLA, A., MANCONI, A.,  
829 GNOCCHI, M., MOSCATELLI, M., AVNI, R., DEEK, J., BIYIKLIOGLU, S., FRASCAROLI, E.,  
830 CORNETI, S., SALVI, S., SONNANTE, G., DESIDERIO, F., MARÈ, C., CROSATTI, C., MICA, E.,  
831 ÖZKAN, H., KILIAN, B., DE VITA, P., MARONE, D., JOUKHADAR, R., MAZZUCOTELLI, E., NIGRO,  
832 D., GADALETA, A., CHAO, S., FARIS, J. D., MELO, A. T. O., PUMPHREY, M., PECCHIONI, N.,

- 833 MILANESI, L., WIEBE, K., ENS, J., MACLACHLAN, R. P., CLARKE, J. M., SHARPE, A. G., KOH, C.  
834 S., LIANG, K. Y. H., TAYLOR, G. J., KNOX, R., BUDAK, H., MASTRANGELO, A. M., XU, S. S.,  
835 STEIN, N., HALE, I., DISTELFELD, A., HAYDEN, M. J., TUBEROSA, R., WALKOWIAK, S., MAYER,  
836 K. F. X., CERIOTTI, A., POZNIAK, C. J. & CATTIVELLI, L. 2019. Durum wheat genome highlights  
837 past domestication signatures and future improvement targets. *Nature Genetics*.
- 838 MAMANOVA, L., COFFEY, A. J., SCOTT, C. E., KOZAREWA, I., TURNER, E. H., KUMAR, A., HOWARD, E.,  
839 SHENDURE, J. & TURNER, D. J. 2010. Target-enrichment strategies for next-generation  
840 sequencing. *Nature Methods*, 7, 111.
- 841 MO, Y., HOWELL, T., VASQUEZ-GROSS, H., DE HARO, L. A., DUBCOVSKY, J. & PEARCE, S. 2018.  
842 Mapping causal mutations by exome sequencing in a wheat TILLING population: a tall  
843 mutant case study. *Molecular Genetics and Genomics*, 293, 463-477.
- 844 NOAA NATIONAL CENTERS FOR ENVIRONMENTAL INFORMATION 2017. State of the Climate:  
845 National Climate Report for Annual 2017.
- 846 PATERSON, A. H., WANG, X., LI, J. & TANG, H. 2012. Ancient and Recent Polyploidy in Monocots. *In*:  
847 P., S. & D., S. (eds.) *Polyploidy and Genome Evolution*. Berlin, Heidelberg: Springer.
- 848 PEARCE, S., TABBITA, F., CANTU, D., BUFFALO, V., AVNI, R., VAZQUEZ-GROSS, H., ZHAO, R., CONLEY,  
849 C. J., DISTELFELD, A. & DUBCOVSKY, J. 2014. Regulation of Zn and Fe transporters by the  
850 GPC1 gene during early wheat monocarpic senescence. *BMC Plant Biology*, 14, 368.
- 851 PENG, J., RICHARDS, D. E., HARTLEY, N. M., MURPHY, G. P., DEVOS, K. M., FLINTHAM, J. E., BEALES, J.,  
852 FISH, L. J., WORLAND, A. J., PELICA, F., SUDHAKAR, D., CHRISTOU, P., SNAPE, J. W., GALE, M.  
853 D. & HARBERD, N. P. 1999. 'Green revolution' genes encode mutant gibberellin response  
854 modulators. *Nature*, 400, 256-261.
- 855 R CORE TEAM 2018. R: A Language and Environment for Statistical Computing. *In*: COMPUTING, R. F.  
856 F. S. (ed.). Vienna, Austria.
- 857 RAMÍREZ-GONZÁLEZ, R. H., BORRILL, P., LANG, D., HARRINGTON, S. A., BRINTON, J., VENTURINI, L.,  
858 DAVEY, M., JACOBS, J., VAN EX, F., PASHA, A., KHEDIKAR, Y., ROBINSON, S. J., CORY, A. T.,  
859 FLORIO, T., CONCIA, L., JUERY, C., SCHOONBEEK, H., STEUERNAGEL, B., XIANG, D., RIDOUT, C.  
860 J., CHALHOUB, B., MAYER, K. F. X., BENHAMED, M., LATRASSE, D., BENDAHMANE, A., WULFF,  
861 B. B. H., APPELS, R., TIWARI, V., DATLA, R., CHOULET, F., POZNIAK, C. J., PROVART, N. J.,  
862 SHARPE, A. G., PAUX, E., SPANNAGL, M., BRÄUTIGAM, A. & UAUY, C. 2018. The  
863 transcriptional landscape of polyploid wheat. *Science*, 361, eaar6089.
- 864 RAMIREZ-GONZALEZ, R. H., SEGOVIA, V., BIRD, N., FENWICK, P., HOLDGATE, S., BERRY, S., JACK, P.,  
865 CACCAMO, M. & UAUY, C. 2015a. RNA-Seq bulked segregant analysis enables the  
866 identification of high-resolution genetic markers for breeding in hexaploid wheat. *Plant*  
867 *Biotechnology Journal*, 13, 613-624.
- 868 RAMIREZ-GONZALEZ, R. H., UAUY, C. & CACCAMO, M. 2015b. PolyMarker: A fast polyploid primer  
869 design pipeline. *Bioinformatics (Oxford, England)*, 31, 2038-2039.
- 870 RODRÍGUEZ-LEAL, D., LEMMON, Z. H., MAN, J., BARTLETT, M. E. & LIPPMAN, Z. B. 2017. Engineering  
871 Quantitative Trait Variation for Crop Improvement by Genome Editing. *Cell*, 171, 470-480.e8.
- 872 ŠIMKOVÁ, H., SVENSSON, J. T., CONDAMINE, P., HŘIBOVÁ, E., SUCHÁNKOVÁ, P., BHAT, P. R.,  
873 BARTOŠ, J., ŠAFÁŘ, J., CLOSE, T. J. & DOLEŽEL, J. 2008. Coupling amplified DNA from flow-  
874 sorted chromosomes to high-density SNP mapping in barley. *BMC Genomics*, 9, 294.
- 875 SIMONS, K. J., FELLERS, J. P., TRICK, H. N., ZHANG, Z., TAI, Y.-S., GILL, B. S. & FARIS, J. D. 2006.  
876 Molecular Characterization of the Major Wheat Domestication Gene *Q*. *Genetics*, 172, 547.
- 877 SINGH, S., GIRI, M. K., SINGH, P. K., SIDDIQUI, A. & NANDI, A. K. 2013. Down-regulation of *OsSAG12-1*  
878 results in enhanced senescence and pathogen-induced cell death in transgenic rice plants.  
879 *Journal of Biosciences*, 38, 583-592.
- 880 SNOWBALL, K. & ROBSON, A. D. 1991. Nutrient Deficiencies and Toxicities in Wheat: A Guide for  
881 Field  
882 Identification. *In*: CIMMYT (ed.). Mexico, D.F.



- 883 SOLTIS, P. S. & SOLTIS, D. E. 2016. Ancient WGD events as drivers of key innovations in angiosperms.  
884 *Current Opinion in Plant Biology*, 30, 159-165.
- 885 STEUERNAGEL, B., PERIYANNAN, S. K., HERNÁNDEZ-PINZÓN, I., WITEK, K., ROUSE, M. N., YU, G.,  
886 HATTA, A., AYLIFFE, M., BARIANA, H., JONES, J. D. G., LAGUDAH, E. S. & WULFF, B. B. H. 2016.  
887 Rapid cloning of disease-resistance genes in plants using mutagenesis and sequence capture.  
888 *Nature Biotechnology*, 34, 652.
- 889 UAUY, C. 2017. Wheat genomics comes of age. *Current Opinion in Plant Biology*, 36, 142-148.
- 890 UAUY, C., DISTELFELD, A., FAHIMA, T., BLECHL, A. & DUBCOVSKY, J. 2006. A NAC Gene Regulating  
891 Senescence Improves Grain Protein, Zinc, and Iron Content in Wheat. *Science*, 314, 1298.
- 892 UAUY, C., WULFF, B. B. H. & DUBCOVSKY, J. 2017. Combining Traditional Mutagenesis with New  
893 High-Throughput Sequencing and Genome Editing to Reveal Hidden Variation in Polyploid  
894 Wheat. *Annual Review of Genetics*, 51, 435-454.
- 895 VRÁNA, J., CÁPAL, P., ŠIMKOVÁ, H., KARAFIÁTOVÁ, M., ČÍŽKOVÁ, J. & DOLEŽEL, J. 2016. Flow Analysis  
896 and Sorting of Plant Chromosomes. *Current Protocols in Cytometry*, 78, 5.3.1-5.3.43.
- 897 VRÁNA, J., KUBALÁKOVÁ, M., SIMKOVÁ, H., ČÍHALÍKOVÁ, J., LYSÁK, M. A. & DOLEZEL, J. 2000. Flow  
898 Sorting of Mitotic Chromosomes in Common Wheat (*Triticum aestivum* L.). *Genetics*, 156,  
899 2033.
- 900 VULLO, A., ALLOT, A., ZADISSIA, A., YATES, A., LUCIANI, A., MOORE, B., BOLT, B. J., GRABMUELLER, C.,  
901 ONG, C. K., BOLSER, D. M., STAINES, D. M., CARVALHO-SILVA, D., TAPANARI, E., PERRY, E.,  
902 MASLEN, G., WILLIAMS, G., NAAMATI, G., PEDRO, H., SPARROW, H., ALLEN, J. E., HOWE, K.  
903 L., TAYLOR, K., MCDOWALL, M. D., RUSSELL, M., BARBA, M., PAULINI, M., CHRISTENSEN, M.,  
904 KUMAR, N., LANGRIDGE, N., DE SILVA, N., DAVIS, P., FINN, R. D., BODDU, S., POTTER, S.,  
905 MAUREL, T., MAHESWARI, U., NEWMAN, V., LIU, Z., KERSEY, P. J., OLSON, A., STEIN, J.,  
906 TELLO-RUIZ, M., WEI, S., WARE, D., HAMMOND-KOSACK, K. E. & URBAN, M. 2017. Ensembl  
907 Genomes 2018: an integrated omics infrastructure for non-vertebrate species. *Nucleic Acids*  
908 *Research*, 46, D802-D808.
- 909 WANG, W., SIMMONDS, J., PAN, Q., DAVIDSON, D., HE, F., BATTAL, A., AKHUNOVA, A., TRICK, H. N.,  
910 UAUY, C. & AKHUNOV, E. 2018. Gene editing and mutagenesis reveal inter-cultivar  
911 differences and additivity in the contribution of *TaGW2* homoeologues to grain size and  
912 weight in wheat. *Theoretical and Applied Genetics*, 131, 2463-2475.
- 913 WANG, Y., HE, Y., YANG, M., HE, J., XU, P., SHAO, M., CHU, P. & GUAN, R. 2016. Fine mapping of a  
914 dominant gene conferring chlorophyll-deficiency in *Brassica napus*. *Scientific Reports*, 6,  
915 31419.
- 916 WARNES, G. R., BOLKER, B., BONEBAKKER, L., GENTLEMAN, R., HUBER, W., LIAW, A., LUMLEY, T.,  
917 MAECHLER, M., MAGNUSSON, A., MOELLER, S., SCHWARTZ, M. & VENABLES, B. 2019. gplots:  
918 Various R Programming Tools for Plotting Data. *R package version 3.0.1.1*.
- 919 WELLBURN, A. R. 1994. The Spectral Determination of Chlorophylls a and b, as well as Total  
920 Carotenoids, Using Various Solvents with Spectrophotometers of Different Resolution.  
921 *Journal of Plant Physiology*, 144, 307-313.
- 922 WICKHAM, H. 2016. *ggplot2: Elegant Graphics for Data Analysis*. , New York, Springer-Verlag.
- 923 WICKHAM, H., FRANÇOIS, R., HENRY, L. & MÜLLER, K. 2019. dplyr: A Grammar of Data Manipulation.  
924 *R package version 0.8.0.1*. .
- 925 WICKHAM, H. & HENRY, L. 2018. tidyr: Easily Tidy Data with 'spread()' and 'gather()' Functions. *R*  
926 *package version 0.8.2*.
- 927 WU, H., SHI, N., AN, X., LIU, C., FU, H., CAO, L., FENG, Y., SUN, D. & ZHANG, L. 2018. Candidate Genes  
928 for Yellow Leaf Color in Common Wheat (*Triticum aestivum* L.) and Major Related Metabolic  
929 Pathways according to Transcriptome Profiling. *International Journal of Molecular Sciences*,  
930 19.
- 931 WYSOKER, A., HANDSAKER, B., MARTH, G., ABECASIS, G., LI, H., RUAN, J., HOMER, N., DURBIN, R. &  
932 FENNELL, T. 2009. The Sequence Alignment/Map format and SAMtools. *Bioinformatics*, 25,  
933 2078-2079.

- 934 YAN, L., HELGUERA, M., KATO, K., FUKUYAMA, S., SHERMAN, J. & DUBCOVSKY, J. 2004. Allelic  
935 variation at the *VRN-1* promoter region in polyploid wheat. *Theoretical and Applied Genetics*,  
936 109, 1677-1686.
- 937 YAN, L., LOUKOIANOV, A., TRANQUILLI, G., HELGUERA, M., FAHIMA, T. & DUBCOVSKY, J. 2003.  
938 Positional cloning of the wheat vernalization gene *VRN1*. *Proceedings of the National*  
939 *Academy of Sciences*, 100, 6263.
- 940 ZADOKS, J. C., CHANG, T. T. & KONZAK, C. F. 1974. A decimal code for the growth stages of cereals.  
941 *Weed Research*, 14, 415-421.
- 942 ZONG, Y., WANG, Y., LI, C., ZHANG, R., CHEN, K., RAN, Y., QIU, J.-L., WANG, D. & GAO, C. 2017.  
943 Precise base editing in rice, wheat and maize with a Cas9-cytidine deaminase fusion. *Nature*  
944 *Biotechnology*, 35, 438.

945 **Figures**

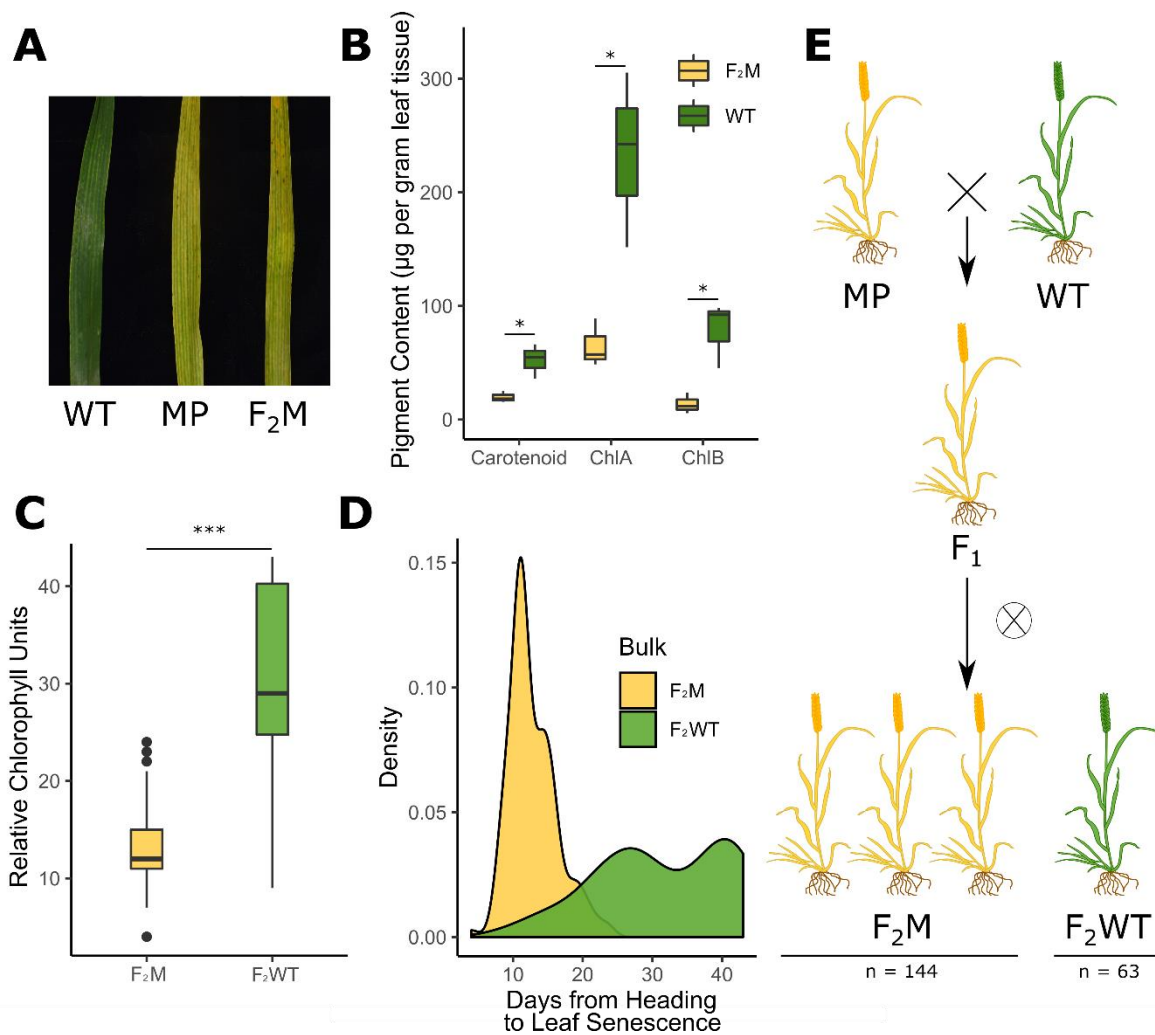

946

947 **Figure 1: A premature yellowing phenotype from the Kronos TILLING population**  
 948 **segregates as a single dominant locus.** F<sub>2</sub> populations of the K2282 Kronos TILLING line  
 949 grown at the JIC in 2016 showed an early yellowing phenotype (A). Pigment content was  
 950 measured in the yellow mutant plants (F<sub>2</sub>M) compared to the wild-type plants (F<sub>2</sub>WT) (B; n = 3  
 951 per genotype) and was also quantified using SPAD (C; n = 153 F<sub>2</sub>M, n = 61 F<sub>2</sub>WT). The yellow  
 952 group (F<sub>2</sub>M) senesced significantly earlier than the late bulk (F<sub>2</sub>WT) (D; n = 148 F<sub>2</sub>M, n = 56  
 953 F<sub>2</sub>WT). Scoring of the plants demonstrated that the F<sub>2</sub> population was segregating 3:1 for the  
 954 yellow trait, indicative of a dominant single locus (E; numbers are combined for both  
 955 populations). F<sub>2</sub>M and F<sub>2</sub>WT refer to plants which are yellow and green, respectively, and which  
 956 derive from the F<sub>2</sub> population (see bottom of E), while WT and MP refer to Kronos WT plants or  
 957 M<sub>4</sub> K2282 plants, respectively (see top of E).

958

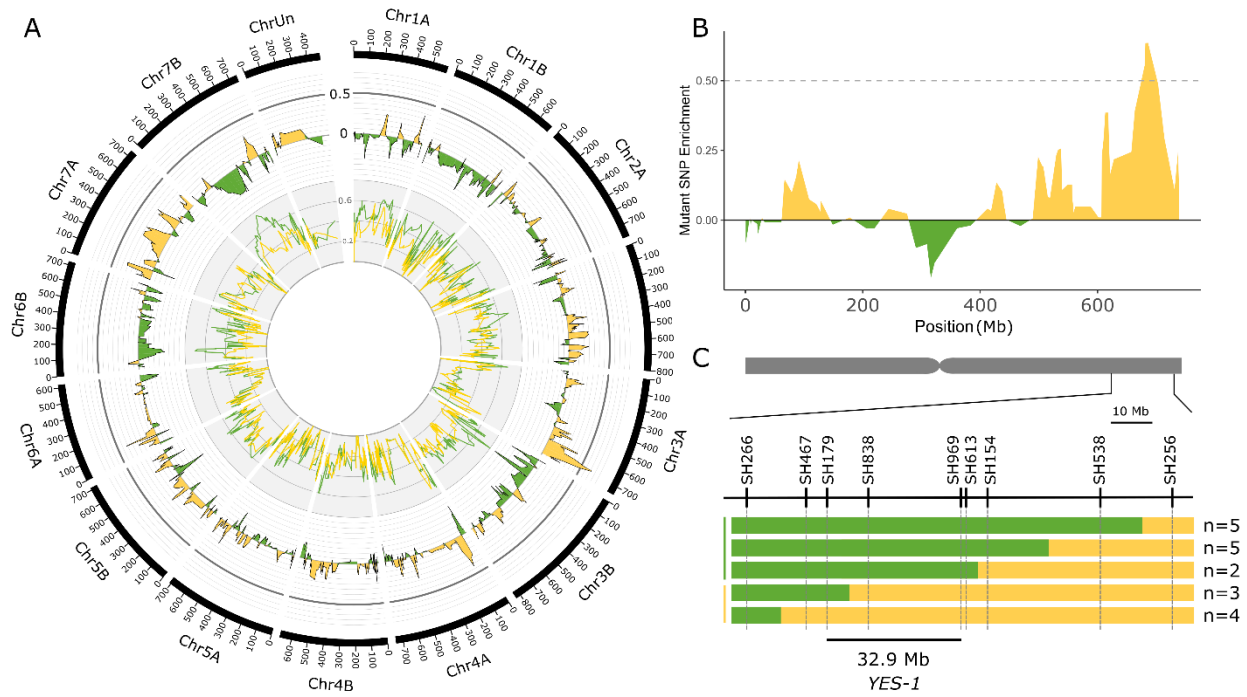

959

960 **Figure 2: Bulked segregant analysis identifies the *YES-1* locus on chromosome 3A.** Exome  
961 capture was carried out on yellow and green bulks from K2282 x Kronos F<sub>2</sub> populations grown at  
962 the JIC in 2016. The K2282 yellow bulk (yellow line, inner track; smoothed to a moving average  
963 of 4) and green bulk (green line) were scored at each SNP locus identified for enrichment of the  
964 mutant allele. The level of enrichment in the green bulk was subtracted from that of the yellow  
965 bulk to obtain the  $\Delta$  value (outer track; smoothed to a moving average of 4). A high  $\Delta$  value,  
966 indicative of a region enriched for mutant alleles within the yellow bulks, was identified on the  
967 long arm of chromosome 3A (B; smoothed to a moving average of 4). Markers designed on  
968 known TILLING SNPs within this region mapped the *YES-1* locus to a 32.9 Mb interval within  
969 the F<sub>2</sub> population (C). Green bars indicate wild-type calls, while yellow bars indicate mutant or  
970 heterozygous calls. The numbers of individual plants that fell into each recombination interval are  
971 shown to the right. The chromosome scale in (A) is given in Mb.

972



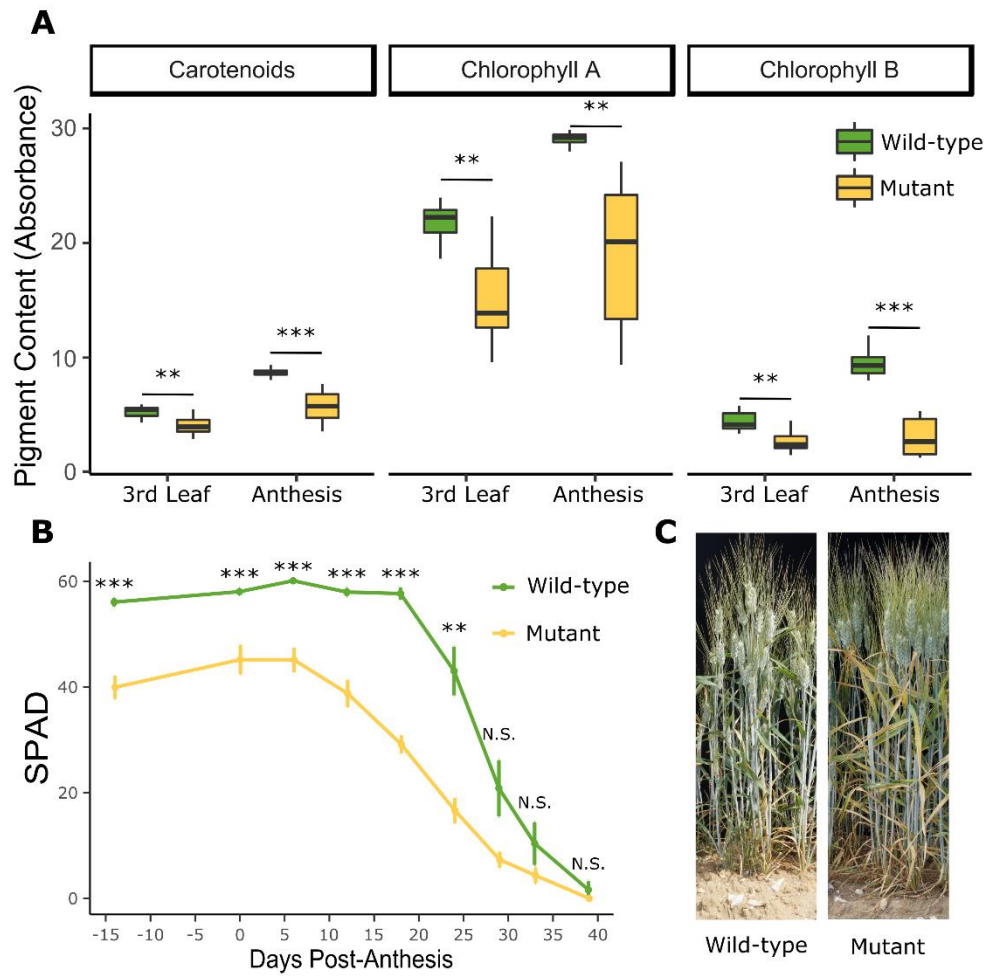

973

974 **Figure 3: The *YES-1* locus causes lower chlorophyll levels before anthesis and earlier onset**  
 975 **of senescence.** The early chlorosis phenotype was recapitulated in the JIC 2018 field trials.  
 976 Pigment content in the mutant lines is significantly lower at the third leaf stage (Zadoks 13-14, 24  
 977 days before anthesis) and becomes more extreme by anthesis (A; \*\*,  $p < 0.01$ ; \*\*\*,  $p < 0.001$   
 978 Student's T-test). Relatively chlorophyll content, as measured with a SPAD meter, is significantly  
 979 decreased in the mutant lines before anthesis, and remains significantly lower until 29 days post-  
 980 anthesis (B; \*\*,  $p < 0.01$ ; \*\*\*,  $p < 0.001$  Pairwise Wilcoxon Rank Sum, adjusted for FDR). The  
 981 yellowing phenotype in the leaves were clear in the field at 20 DPA (C).

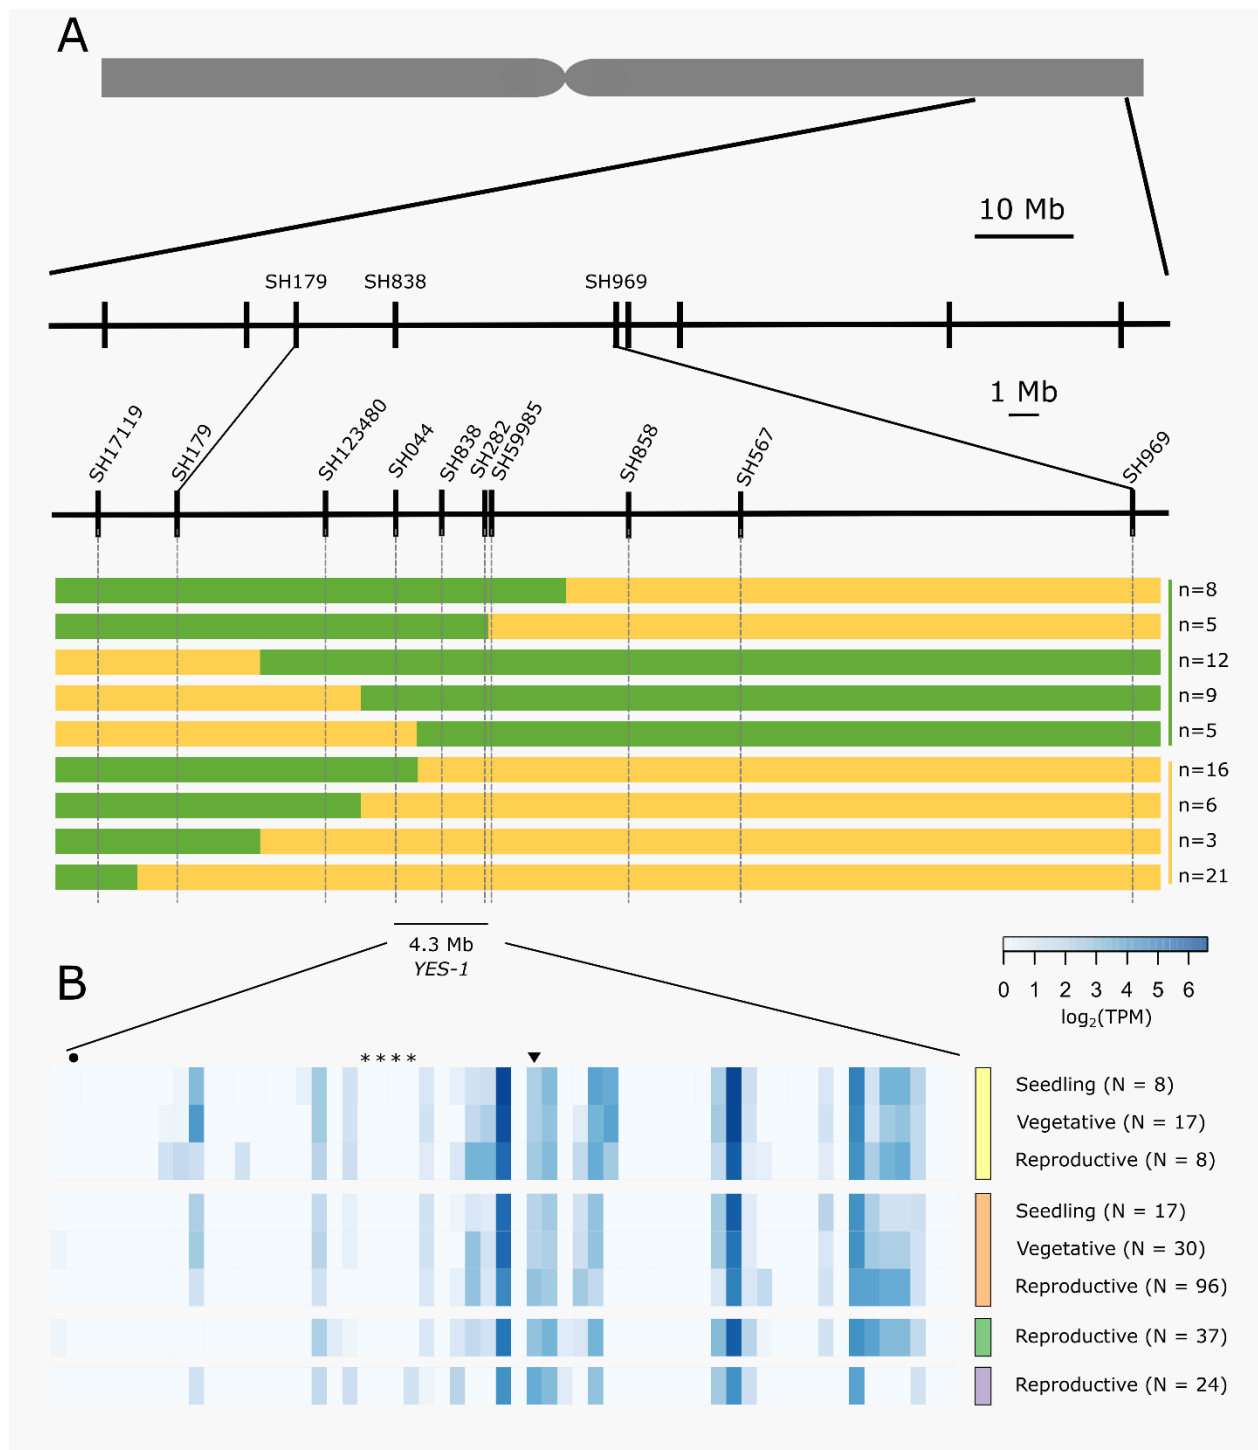

982

983 **Figure 4: The *YES-1* locus fine-maps to a 4.3 Mb region containing 59 genes.** Markers were  
 984 developed for novel SNPs identified in non-coding regions. We used phenotypic data from JIC  
 985 2017 and 2018 field trials to classify recombinant lines as green or yellow. (A). These markers  
 986 mapped *YES-1* to a 4.3 Mb interval between markers SH044 and SH59985. Expression data for  
 987 the 59 high-confidence genes in the region (B) from developmental time course data (Ramírez-  
 988 González et al., 2018) highlights gene expression in root (yellow, top), leaf/shoot (orange, second  
 989 from top), spike (green, second from bottom) and grain (purple, bottom) tissues across  
 990 developmental stages. Genes mentioned in the text are highlighted by an asterisk  
 991 (TraesCS3A02G412900 to TraesCS3A02G413200; *OsSAG12* orthologs), a circle  
 992 (TraesCS3A02G410800; *Tryptophan Decarboxylase 2*) or an inverted triangle  
 993 (TraesCS3A02G414000; putative magnesium transporter).
